1 **CorRelator: An interactive and flexible toolkit for high-precision cryo-correlative light**  
2 **and electron microscopy**

3

4 Jie E. Yang<sup>1</sup>, Matthew R. Larson<sup>1,2</sup>, Bryan S. Sibert<sup>1,2</sup>, Samantha Shrum<sup>3</sup>, and Elizabeth R.  
5 Wright<sup>1,2,3,4,\*</sup>

6

7

8 <sup>1</sup>Department of Biochemistry, University of Wisconsin, Madison, WI 53706

9 <sup>2</sup>Cryo-Electron Microscopy Research Center, Department of Biochemistry, University of  
10 Wisconsin, Madison, WI 53706

11 <sup>3</sup>Biophysics Graduate Program, University of Wisconsin, Madison, WI 53706

12 <sup>4</sup>Morgridge Institute for Research, Madison, WI, 53715

13

14

15 \*To whom correspondence should be addressed. E-mail: [erwright2@wisc.edu](mailto:erwright2@wisc.edu); Tel. (+1) 608-265-  
16 0666; Fax. (+1) 608-265-4693

17

18

19 Word count (main text): 7,421

20 **Abstract**

21 Cryo-correlative light and electron microscopy (CLEM) is a technique that uses the  
22 spatiotemporal cues from fluorescence light microscopy (FLM) to investigate the high-resolution  
23 ultrastructure of biological samples by cryo-electron microscopy (cryo-EM). Cryo-CLEM  
24 provides advantages for identifying and distinguishing fluorescently labeled proteins,  
25 macromolecular complexes, and organelles from the cellular environment. Challenges remain on  
26 how correlation workflows and software tools are implemented on different microscope  
27 platforms to support microscopy-driven structural studies. Here, we present an open-source  
28 desktop application tool, CorRelator, to bridge between cryo-FLM and cryo-EM/ET data  
29 collection instruments. CorRelator was designed to be flexible for both on-the-fly and post-  
30 acquisition correlation schemes. The CorRelator workflow is easily adapted to any fluorescence  
31 and transmission electron microscope (TEM) system configuration. CorRelator was  
32 benchmarked under cryogenic and ambient temperature conditions using several FLM and TEM  
33 instruments, demonstrating that CorRelator is a rapid and efficient application for image and  
34 position registration in CLEM studies. CorRelator is a cross-platform software featuring an  
35 intuitive Graphical User Interface (GUI) that guides the user through the correlation process.  
36 CorRelator source code is available at: <https://github.com/wright-cemrc-projects/corr>.

37

## 38 **Introduction**

39

40 Cryo-correlative light and electron microscopy (cryo-CLEM) is the coupling of (cryo-)  
41 fluorescence light microscopy (FLM) and cryo-electron microscopy (cryo-EM). Cryo-CLEM has  
42 proven to be a powerful method for *in situ* structural studies, including time-dependent events,  
43 especially those associated with viral entry, replication, and egress (Briegel et al., 2010; Fu et al.,  
44 2019; Hampton et al., 2016; Jun et al., 2019; Koning et al., 2014; Koster & Grünewald, 2014;  
45 Schorb et al., 2017; Wolff et al., 2016; Zhang, 2013). Fluorescent labeling and light-level imaging  
46 of viral and cellular factors enables one to capture dynamic events during virus-infection of  
47 cultured cells for real time rapid identification of targets, and for orienting on their spatial  
48 positions. Subsequently, cryo-electron microscopy (cryo-EM) and tomography (cryo-ET) are used  
49 to determine nanometer- and sub-nanometer-resolution three-dimensional (3D) structures of  
50 macromolecules present in virus-infected cells (Bharat et al., 2017; Brandt et al., 2010; Briggs,  
51 2013; Dick et al., 2020; Erlendsson et al., 2020; Kovtun et al., 2018; Strauss et al., 2015; Wan et  
52 al., 2017). In cryo-EM, the rapid vitrification of biological samples minimizes preparative artifacts  
53 typically associated with conventional EM procedures such as chemical fixation, dehydration, and  
54 resin-embedding (Hampton et al., 2016; Faas et al., 2013; Jun et al., 2011; Lučić et al., 2013, 2007;  
55 Moser et al., 2019). This is important for *in vivo* investigations of pleomorphic viruses and cell  
56 membrane-connected events such as viral assembly and budding, because membrane morphology  
57 and membrane-associated protein organization may be altered by conventional fixation protocols  
58 (Ke, Dillard, et al., 2018; Ke, Strauss, et al., 2018; Luque & Castón, 2020).

59

60 In cryo-CLEM, sample vitrification can be performed either before or after fluorescence imaging  
61 (Briegel et al., 2010). Fluorescence imaging of a specimen prior to sample vitrification is important

62 because of the improved resolution of immersion-objective microscopes and options for dynamic,  
63 time-resolved imaging (Fu et al., 2019; Jun et al., 2011). However, specimen states observed prior  
64 to cryo-fixation may change, be disrupted, or damaged by the vitrification process, thereby limiting  
65 the precision of correlation. Cryo-fluorescence microscopes (cryo-FLM) equipped with dedicated  
66 ‘cryo-stages’ that maintain specimens well below -150°C have made it possible to correlate  
67 biological events on vitrified samples. In recent years, various solutions have been introduced to  
68 optimize low-temperature imaging, to reduce the number of grid transfer steps, and to realize high-  
69 resolution cryo-FLM. These include the development and use of stable cryo-stages (Jun et al.,  
70 2011; Schellenberger et al., 2014; Schorb et al., 2017; Schorb & Briggs, 2014; Schwartz et al.,  
71 2007; van Driel et al., 2009), integrated cryo-FLM and -EM systems (Agronskaia et al., 2008; Faas  
72 et al., 2013; Gorelick et al., 2019; Li et al., 2018), and high numerical-aperture (NA) cryo-objective  
73 lenses (Li et al., 2018; Nahmani et al., 2017; Schorb et al., 2017). In addition, super-resolution  
74 cryo-CLEM systems have been explored, aiming to further bridge the resolution gap between LM  
75 and EM imaging modalities (Chang et al., 2014; Liu et al., 2015; Kaufmann et al., 2014; Moser et  
76 al., 2019; Nahmani et al., 2017).

77

78 Cryo-correlation typically proceeds in two steps, on-the-fly targeting and post-acquisition  
79 superposition. On-the-fly correlation guides cryo-EM/ET data collection to targets of interest  
80 (TOI), while post-acquisition transformations support precise mapping of fluorescent signals to  
81 reveal ultrastructural details of targeted or potentially unknown objects in the TEM or acquired  
82 TEM images. In order to facilitate targeting, TEM grids may be marked with numbers and letters  
83 (i.e., Finder grids) to aid in the rough correlation process. Application of fiducial markers to the  
84 sample before vitrification, such as fluorescent electron-dense microspheres, can support finer-

85 scale correlations of approximately 10 to 100 nm (Fu et al., 2019; Kukulski et al., 2011; Li et al.,  
86 2018; Schellenberger et al., 2014; Schorb & Briggs, 2014). A less common method is to use EM  
87 grid support features, including holes and imperfections in the carbon film, to achieve marker-free  
88 correlative alignment (Anderson et al., 2018). In all cases, there are still difficulties to overcome.  
89 First, the distribution of fiducial markers across the entire grid needs to be relatively uniform for  
90 alignments to be reliable. The optimized density must be high enough to provide good alignment,  
91 but low enough not to obscure fluorescent signals from TOIs. Second, bent, warped, or crinkled  
92 vitrified grids and uneven ice-thickness hinder automated detection of the holes in the carbon films,  
93 leading to poor relocation of the same hole on both maps. Therefore, an interactive yet unbiased  
94 approach for reliable registration is needed.

95

96 A number of research groups have developed software or scripts to facilitate the coordinate transfer  
97 step (Anderson et al., 2018; Fu et al., 2019; Jun et al., 2011; Kukulski et al., 2011; Li et al., 2018;  
98 Paul-Gilloteaux et al., 2017; Rigort et al., 2010; van Driel et al., 2009; Schwartz et al., 2007). Most  
99 of the tools are available to the community, however, several are not easily incorporated into  
100 existing or under-development correlative cryo-ET data collection routines. For example, some  
101 are system-dependent and built for specific workflows and hardware configurations (Gorelick et  
102 al., 2019; Li et al., 2018). Others may require access to licensed materials such as MATLAB or  
103 for users to be savvy at programming languages (Fu et al., 2019; Kukulski et al., 2011; van Driel et  
104 al., 2009). ImageJ- or Icy-based solutions implement transformation algorithms to manage  
105 complicated geometric distortions, but are used for post-acquisition high-accuracy correlation, and  
106 are less practical for on-the-fly targeting applications. There is a growing need for specimen-

107 specific, multi-level correlative schemes that are flexible and easily customized for current and  
108 future instruments and workflows (Sartori-Rupp et al., 2019; Strnad et al., 2015).

109

110 Here, we present a cross-platform, user-friendly desktop application tool called “CorRelator” for  
111 interactive and precise coordinate translation between cryo-FLM and cryo-EM/ET. The flexibility  
112 and system-independent nature of the tool for cryo-CLEM applications is demonstrated in  
113 combination with the microscope-control platform SerialEM (Mastrorade, 2005) and vitrified  
114 cells infected with respiratory syncytial virus (RSV). We demonstrate that efficiency and target  
115 prediction of the CorRelator cryo-CLEM workflow guide the user to select regular grid support  
116 features (e.g., hole centroids) for accurate alignment. We show that lower lateral spatial resolutions  
117 that may be present in cryo-FLM data can be partially compensated for through advanced  
118 computational background cleaning and signal deconvolution processing. To balance between  
119 unbiased automation and human intervention, CorRelator supports iterative labeling of registration  
120 positions and quick feedback-based alignment of FLM/TEM images. As more complex correlative  
121 strategies evolve and the demand for system-independent cryo-CLEM schemes increases, we  
122 believe that this tool will facilitate efforts in a broad-range of project-specific correlative  
123 workflows. CorRelator is open-source and freely available for download at  
124 (<https://github.com/wright-cemrc-projects/corr>).

## 125 **Materials and Methods**

### 126 **Cell culture and infection on TEM grids**

127 Quantifoil grids (200 mesh Au R2/2 and Au Finder; Quantifoil Micro Tools GmbH, Großlobbichau,  
128 Germany) were coated with an extra layer of carbon for stabilization and then glow discharged for  
129 improved hydrophilicity. The grids were subsequently coated with 100 nm and 500 nm fluorescent  
130 microspheres (TetraSpeck Microspheres, Invitrogen T7279, T7281, USA) at a 500x or 1000x  
131 dilution for 5 min, followed with a washing step using 1x PBS. HeLa cells (ATCC CCL-2, ATCC,  
132 Manassas, VA, USA) were seeded on the bead-coated grids at a density of  $0.5-0.75 \times 10^5$  cells/mL  
133 in glass-bottomed culture dishes (MatTek Corp., MA, USA) (Schellenberger et al., 2014). The  
134 grids and dishes seeded with HeLa cells were cultured overnight at 37 °C with 5% CO<sub>2</sub> in DMEM  
135 complete medium supplemented with 10% fetal bovine serum (FBS), 1 µg/mL penicillin,  
136 streptomycin and amphotericin B (PSA) antibiotics. After overnight incubation, the cell-seeded  
137 grids were inoculated with the recombinant virus strain RSV rA2-mK<sup>+</sup> (Hotard et al., 2012).  
138 Twenty-four hours post-infection, native immunogold labeling of RSV glycoprotein F was carried  
139 out as published previously (Yi et al., 2015), with a primary antibody (motavizumab, 4 µg/mL  
140 (gift from Larry J. Anderson, Emory University)) and secondary antibody Alexa Fluor 488  
141 Nanogold Goat anti-human IgG (Nanoprobes, NY, USA) (Cheutin et al., 2007). 4 µl of 10 nm  
142 gold fiducial beads (Aurion Gold Nanoparticles, Electron Microscopy Sciences, PA, USA) were  
143 applied to the RSV-infected cell EM grids to aid in image alignment during the reconstruction  
144 process. The grids with RSV-infected HeLa cells were plunge-frozen using a Gatan CryoPlunge3  
145 system with GentleBlot blotters (Gatan, Inc., Pleasanton, CA, USA).

146

### 147 **Correlative fluorescence microscopy**

148 Two CLEM-CorRelator workflows were tested, using a Leica DMI8 widefield fluorescence  
149 microscope at room-temperature or a Leica EM Cryo-CLEM microscope system under cryo-  
150 conditions (Leica MicroSystems, Germany). For room-temperature correlation, TetraSpeck-  
151 coated (100 nm) Quantifoil Finder EM grids were imaged at 40 x magnification (40 x, 0.6 NA  
152 lens, dry) and 63 x magnification (63 x, 1.4 NA lens, oil-immersion) in brightfield, GFP (emission,  
153 525 nm), and Texas Red (emission, 619 nm) channels with Micro-Manager (Edelstein et al., 2014,  
154 2010). Cryo-FLM of the grid of RSV-infected HeLa cells was performed using a Leica EM Cryo  
155 CLEM system (50x, ceramic-tipped, 0.90 NA), through bright field and the band pass filter cubes  
156 of 525 nm and 630 nm, with the dedicated Leica LAS X microscope software (Hampton et al.,  
157 2016; Schorb et al., 2017). Images combined to generate 12 to 15  $\mu\text{m}$  Z-stack projections were  
158 collected of vitrified grids at a Nyquist sampling step of 350 nm to compensate for cell thickness  
159 and wavy or warped grids. The Small Volume Computational Clearance (SVCC) implemented in  
160 the Leica LAS X THUNDER package was applied to the post-acquisition image stacks to reduce  
161 image blurring and to restore weaker or lower signals. Images and mosaic tiles were exported and  
162 used as compressed lossless RGB TIFF format. We determined the point spread function (PSF) of  
163 the fluorescent signal (emission  $\lambda = 525$  nm) of 500 nm TetraSpeck beads in the unprocessed and  
164 SVCC-processed cryo-FLM image stacks ( $n = 10$ ). Additional image processing steps such as  
165 flipping, cropping, contrast adjustment were performed in ImageJ/Fiji (Schindelin et al., 2012).

166

### 167 **Cryo-electron microscopy, cryo-electron tomography, and tomogram reconstruction**

168 After FLM imaging at room temperature, the bead-coated Quantifoil Finder grids were imaged  
169 with a Tecnai T12 (ThermoScientific, Hillsboro, OR, USA) operated at 120 kV and equipped with  
170 a 4k x 4k Gatan OneView camera using SerialEM (Mastrorarde, 2005). After cryo-FLM imaging,



171 bare grids with immunolabeled RSV-infected HeLa cells were imaged using a Titan Krios  
172 (ThermoScientific, Hillsboro, OR, USA) at 300 kV. Images were acquired on a post-GIF Gatan  
173 K3 camera in EFTEM mode with a 20 eV slit. Images were recorded at magnification of 81x  
174 (4,485 Å/pixel), 470x (399 Å/pixel), 2250x (76 Å/pixel), and 19500x (4.47 Å/pixel). All grid TEM  
175 maps were collected in SerialEM.

176

177 Tilt series were collected bi-directionally with 2° increments covering a tilt range of -60 ° to 60°  
178 at a magnification of 19500x (4.47 Å/pixel) and nominal defocus of -8 μm with a total dose of 80  
179 to 100 e-/Å<sup>2</sup>. Tilt series were aligned using 10 nm fiducial beads and reconstructed with weighted  
180 back-projection algorithm using the IMOD package (Kremer et al., 1996). The cryo-tomograms  
181 reconstructed in IMOD were denoised using the low pass Gaussian filter function on 3D volumes  
182 implemented in EMAN2 (Tang et al., 2007), followed by smooth filtering with a standard kernel  
183 of 3x3 in IMOD, to enhance contrast.

184

#### 185 **Identification of hole centers in ImageJ/Fiji**

186 To identify the center positions of the holes in the fluorescent TIFF images, we followed similar  
187 steps as described previously (Anderson et al., 2018). Briefly, the raw images were cropped based  
188 on targets of interest (TOI). Some images were downsized by a binning factor of 2 to increase the  
189 computational processing speed. The raw images had multiple channels including brightfield and  
190 fluorescent channels (e.g., GFP and Texas Red). The cropped fluorescent channel frame (usually  
191 with high noise) was subject to iterative non-local mean filtering (Buades et al., 2005) to optimize  
192 efficiency in hole identification in the carbon film. Alternatively, brightfield frames may be used  
193 when the shift between frames of the different channels was tolerable (less than 1% of target  
194 identification exceeding 2-pixel difference). An iterative median filter of 2 to 6 iterations and

195 optimal threshold for binarization were applied to preserve sharpness of the hole edges. Then, the  
196 binarized images were processed with the Canny edge detector function (Canny, 1986), followed  
197 by the circular Hough transform function (Illingworth & Kittler, 1987) to determine the optimal  
198 radius for hole detection and center coordinates of each detected hole. The whole procedure was  
199 carried out using the ImageJ/Fiji platform (Schindelin et al., 2012) where the Canny Edge Detector  
200 and circular Hough Transform Functions were loaded and run as plugins. The hole center  
201 coordinates  $(P_x, P_y)$  of a fluorescent TIFF image were exported in the comma-separated value  
202 (CSV) file format. For TEM image map and montages collected in SerialEM, the hole centers were  
203 identified following the same procedure described above. SerialEM also has a built-in function to  
204 label a 2D grid of hole centers for TEM maps in its Navigator module, “Add Grid of Points”  
205 function.

206

### 207 **Registration of stage positions in CorRelator**

208 Image maps are next imported into CorRelator. The default coordinate system in ImageJ/Fiji is  
209 left-handed with (0,0) defining the top left corner. Pixel coordinates in this system can be directly  
210 imported from CSV formats to an image map in CorRelator. Additional positions can be manually  
211 assigned or modified. Correlator then facilitates iteratively importing and assigning pixel positions  
212 on maps and converting pixel coordinates to the stage positions. The stage positions are exportable  
213 as a Navigator file in autodoc format that can be directly read into SerialEM. Alternatively,  
214 CorRelator can solve for an affine transformation function that directly aligns the stage positions  
215 and maps.

216

### 217 **Affine transformation in CorRelator**

218 We adopted the close-form solution to the least square problem for an overdetermined system to  
219 determine the optimal transformation matrix between two modalities (Horn, 1987). While at least  
220 4 reference coordinate pairs are required to avoid the singular matrix problem, unlimited reference  
221 points can be added and incorporated into the solution. Due to the location error in the reference  
222 pair positioning, the calculated alignment will not satisfy or fit into all pairs. Instead, it is set to  
223 find the best-fitting solution that minimizes the sum of squared errors between targets and  
224 predicted outputs.

225

$$226 \begin{bmatrix} x_0 & \dots & x_n \\ y_0 & \dots & y_n \\ 1 & \dots & 1 \end{bmatrix} * M = \begin{bmatrix} Px_0 & \dots & Px_n \\ Py_0 & \dots & Py_n \\ 1 & \dots & 1 \end{bmatrix}, \quad (1)$$

227

228 Where  $\begin{bmatrix} x_0 & \dots & x_n \\ y_0 & \dots & y_n \\ 1 & \dots & 1 \end{bmatrix}$  and  $\begin{bmatrix} Px_0 & \dots & Px_n \\ Py_0 & \dots & Py_n \\ 1 & \dots & 1 \end{bmatrix}$  are matching homogenous reference pairs of X- and

229 Y- image coordinates in the fluorescent image and TEM image to which the fluorescent image is

230 registered,  $M$  is the transformation matrix. To simplify the equation (3), set  $\begin{bmatrix} x_0 & \dots & x_n \\ y_0 & \dots & y_n \\ 1 & \dots & 1 \end{bmatrix}$  as

231 matrix  $P \in R^n$ ,  $\begin{bmatrix} Px_0 & \dots & Px_n \\ Py_0 & \dots & Py_n \\ 1 & \dots & 1 \end{bmatrix}$  as matrix  $Q \in R^n$ , then for an overdetermined system,

232

$$233 \hat{M} = QP^T \text{inverse}(PP^T) \quad (2)$$

234 When  $P\hat{M}=Q$  is consistent, then  $\hat{M} = M$  the usual matrix solution. Matrix multiplication,

235 transposition, and inverse calculations were implemented with the Java Apache Commons Math

236 package (Andersen et al., n.d.; Paul-Gilloteaux et al., 2017).

237

238

### 239 **Alignment accuracy estimation**

240 We tested the alignment accuracy of CorRelator and the transformation algorithms of several  
241 programs including MATLAB (MathWorks) and eC-CLEM (Paul-Gilloteaux et al., 2017), using  
242 a procedure called “Leave-one-out” described previously (Fu et al., 2019; Kukulski et al., 2011;  
243 Schellenberger et al., 2014). Briefly, the hole centers in the carbon film within a square were used  
244 as alignment markers while either non-registered hole centroids that were unused and left out or  
245 TetraSpecks (100 or 500 nm) in the FLM image were treated as the TOIs whose positions were  
246 predicted in the registered EM image. The hole centroids were identified as described above. To  
247 select the bead signals, we used a two-dimensional Gaussian function in MATLAB. The predicted  
248 position of TOIs was then compared to the actual position to estimate the individual prediction  
249 error by measuring the Euclidean distance or length between the two points. The deviation on X  
250 and Y axes was calibrated in a form of Euclidean vector. For cryo-CLEM, Quantifoil and  
251 Quantifoil Finder grids of infected HeLa cells followed a similar procedure. In this case, F  
252 glycoprotein labeling (green signal) was treated as the TOIs. To estimate the on-the-fly image  
253 acquisition accuracy based on CorRelator’s predictions, the image shift offsets between  
254 magnifications on a SerialEM-controlled TEM were corrected to avoid additional off-target  
255 variance introduced by the microscope lens performance. We then used the deviation between TOI  
256 positions (fluorescent viruses or TetraSpecks) and the center of the acquired image after moving  
257 to the predicted stage position.

## 258 **Results**

### 259 **CorRelator development**

260 CorRelator supports both on-the-fly and post-acquisition two-dimensional (2D) cryo-correlation.  
261 The on-the-fly correlation and subsequent automated cryo-EM/ET data collection can be  
262 accomplished through SerialEM (Mastronarde, 2005), a versatile software program that controls  
263 the TEM and image detectors. While SerialEM is capable of manual point matching  
264 transformations (Hampton et al., 2016; Schorb et al., 2017; Schwartz et al., 2007), the registration  
265 process can be time-consuming and less accurate due to limited guidance and assessment steps.  
266 To tackle this challenge, CorRelator uses an iterative user-in-the-loop approach to define  
267 registration points and translate external image coordinates into adjustable TEM stage positions in  
268 SerialEM (Fig. 1 and Supplementary Fig. 1B).

269  
270 The key concept of CorRelator is to use image pixel coordinates for robust registration and  
271 incorporate microscope stage-position-to-pixel-coordinate matrices to achieve fast and reliable on-  
272 the-fly correlation. We decided to use SerialEM because (1) it is an open-source program  
273 extensively used in the microscopy community; (2) it is applicable to many existing TEM systems  
274 and imaging detectors; (3) the instrumentation-determined image pixels-to-stage-position  
275 relationships are accessible in its Navigator file, where each image or mosaic is considered as a  
276 Map entry (see Appendix-A). The transformation of image planar coordinates to stage planar  
277 coordinates can be determined by a 2D affine transformation represented in homogeneous form:

278

$$279 \begin{bmatrix} P_x \\ P_y \\ 1 \end{bmatrix} = M_{stage2pixel} \begin{bmatrix} Pt_s X \\ Pt_s Y \\ 1 \end{bmatrix}, \quad (1)$$

280

281 Where  $M_{stage2pixel} = \begin{bmatrix} a & b & c \\ d & e & f \\ 0 & 0 & 1 \end{bmatrix}$  is the stage-to-pixel coordinate transform matrix,  $(P_x, P_y) \in$

282  $R^2$  is the image planar coordinate, and  $(Pt_sX, Pt_sY) \in R^2$  is the transformed TEM planar stage  
283 position. The reverse transform is:

284

285 
$$\begin{bmatrix} Pt_sX \\ Pt_sY \\ 1 \end{bmatrix} = \begin{bmatrix} a & b & c \\ d & e & f \\ 0 & 0 & 1 \end{bmatrix}^{-1} \begin{bmatrix} P_x \\ P_y \\ 1 \end{bmatrix}, \quad (2)$$

286 Where  $\begin{bmatrix} a & b & c \\ d & e & f \\ 0 & 0 & 1 \end{bmatrix}^{-1} = M_{pixel2stage}$  is the pixel-to-stage coordinate transform matrix.

287

288 When a set of external XY coordinates (e.g., points for registration or targets of interest, TOIs)  
289 related to a FLM or TEM map entry in the navigator file, are provided, CorRelator reads and  
290 applies the matrices  $M_{stage2pixel}$  and  $M_{pixel2stage}$  of the associated map to these user-defined  
291 points. As a result, the offline-determined “external” coordinates are translated to recognizable  
292 “inherent” stage positions written out in an updated Navigator file.

293

294 Vitrification ensures preservation of biological samples in a near-native state, greatly limiting  
295 physical deformations, such as non-linear warping of the sample that can occur during chemical  
296 fixation, freeze substitution, sectioning, embedding, and image acquisition. An affine  
297 transformation that preserves co-linearity of all points and ratios of distance, is suitable for accurate  
298 2D coordinate transfer in cryo-CLEM (Fu et al., 2019; Kukulski et al., 2011; Schellenberger et al.,  
299 2014; van Driel et al., 2009). However, the registration may not be accurate for all reference pairs  
300 due to possible errors in the point pair positioning. To handle alignment in CorRelator, the

301 transformation matrix  $M$  between cryo-FLM and EM is calculated using closed-form ordinary  
302 least-squares solutions in digital geometric image correlation (Castleman, 1995; Gonzalez &  
303 Woods, 2002; Horn, 1987). The transformation matrix  $M$  considers changes in magnification,  
304 scaling, rotation, translation, and shearing between FLM and TEM images. The transformation  $M$   
305 is then applied to the coordinates of the fluorescent signal of interest, defining individual translated  
306 pixel and stage positions in the correlated TEM image.

307

308 A flow chart of the algorithm for CorRelator is shown in Figure. 1. CorRelator first defines the  
309  $M_{stage2pixel}$  of different maps in a baseline SerialEM navigator file (Nav\_1). The map may be:  
310 (1) whole grid cryo-EM montages at low magnification with identifiable grid squares, (2)  
311 intermediate magnification mosaics of good areas, or (3) an imported image, i.e., a cryo-FLM  
312 frame. CorRelator adopts an iterative registration approach, supporting (1) interactive manual  
313 selection and or (2) the import of comma-separated values (CSV) files with pixel coordinates from  
314 external sources. A csv file is a common file format exported by many image analysis tools such  
315 as ImageJ/Fiji, IMOD, MATLAB, and other commercial software packages (Kremer et al., 1996;  
316 Schindelin et al., 2012). When provided with two matching sets of pixel coordinate pairs for image  
317 registration, CorRelator converts them into stage positions and calculates the optimal  
318 transformation matrix  $M$  to align the FLM to TEM frame. The alignment performance can be  
319 visually and quantitatively assessed. As a result, the user will be able to quickly decide if another  
320 round of transformation is necessary. The output is an updated functional navigator file referred  
321 as to Nav\_2. Based on the experimental design and workflow, Nav\_2 may be: (1) exported at  
322 various stages, (2) used for direct automated cryo-EM/ET data acquisition at the stage positions of  
323 the transformed fluorescent TOIs (Fig.1 Route 1), or (3) used for further manipulation and

324 transformation in SerialEM (Fig. 1 Route 2). The tool is also suitable for post-acquisition  
325 correlation (Fig 1. Route 3). In this case, a matching set of x- and y- pixel coordinate pairs  
326 identifiable in FLM and EM images are direct registration points for matrix calculation.

327

### 328 **CorRelator graphical user interface (GUI) design and workflow**

329 Another component of CorRelator is the intuitive graphical user interface (GUI) that assembles  
330 robust and flexible correlation paths. The software tool is a cross-platform Java/JavaFX 8 desktop  
331 application with dependencies from Apache Commons Math for matrix manipulations and Java  
332 Advanced Imaging library for graphical format support. The GUI supports multiple pathways for  
333 data management, including a *Project view* (Fig. 2 and Supplementary Fig. 1) and a *Wizard*. The  
334 *Wizard* feature (Fig. 2) is a step-by-step workflow for performing guided on-the-fly and post-  
335 acquisition cryo-FLM to EM transformation. The *Project view* alternatively allows iterative  
336 operations for importing or adding more new maps and pixel positions. The GUI Import feature  
337 allows the tool to work in conjunction with coordinate outputs from libraries of automated  
338 functions and plugins from other image analysis tools. Manual selection options allow the user to  
339 interact and fine tune image and map registration. The *Project view* may be used to open image  
340 viewers of individual or aligned images and labeled pixel locations for quick assessment of  
341 alignment error (Fig. 2B, Supplementary Fig. 1D-F). When using the GUI *Wizard*, a new project  
342 can be created that will record information about maps (File), positions (Import), alignments  
343 (Align to Map), and errors that might arise during transformation (Log). New projects can be saved  
344 as XML-formatted data to preserve pre-alignment and post-alignment transformations of stage  
345 positions. The registration coordinates and corresponding stage position remain constant after  
346 transformation, allowing users to un-align and re-align the images if the transformation is



347 unsatisfactory (Fig. 2B, Supplementary Fig. 1, Video 1). CorRelator can export multiple navigator  
348 files (Nav-2) specific to an experimental workflow and save aligned overlays for subsequent  
349 applications.

350

### 351 **High-accuracy cryo-CLEM Applications with CorRelator**

352 CorRelator fits into the classical two-step cryo-CLEM workflow for accurate and flexible on-the-  
353 fly correlation experiments (Fig. 3, Supplementary Fig. 2). As published previously and detailed  
354 in the Materials and Methods (Hampton et al., 2016; Ke, Dillard, et al., 2018), HeLa cells grown  
355 on a Quantifoil grid were infected by recombinant RSV strain rA2-mK<sup>+</sup> (Hotard et al., 2012)  
356 expressing the far-red monomeric Katushka tag, followed by native immunogold-labeling of the  
357 RSV F glycoprotein (Fluro-nanogold) (Yi et al., 2015). We used a commercial Leica EM cryo-  
358 CLEM system and the LAS X CLEM software to scan entire grids to produce a series of multi-  
359 channel, multi-Z image stacks at each position (Hampton et al., 2016; Schorb et al., 2017). A final  
360 single stitched whole cryo-FLM grid image was then imported into SerialEM for ‘square-level’  
361 rough correlation. Each local FLM image tile of the grid mosaic could be used later for fine  
362 correlation. Subsequent to FLM imaging, the same grid was loaded onto a Titan Krios microscope  
363 (ThermoScientific, Hillsboro, OR, USA) and a low magnification cryo-EM grid montage was  
364 collected with SerialEM for rough correlation (Supplementary Fig. 2A).

365

366 Recognizable grid-level landmarks visible in both FLM and cryo-EM such as torn and broken  
367 squares, cells, and letters or numbers (like those on an EM Finder grid), were used as rough  
368 registration points. Alignment may be difficult and time-consuming when dark regions were  
369 present in the EM image because of thick ice or when the post-FLM imaged grid was flipped or

370 rotated during sample handling. We used the cryo-EM grid map (Supplementary Fig. 2A) as a  
371 reference to transform the raw FLM grid mosaic counterpart by flipping, rotating, and adjusting  
372 its contrast offline (Supplementary Fig. 2B, b) in Fiji, prior to importing into SerialEM. A baseline  
373 SerialEM navigator file, Nav\_1, was generated to store both TEM and the imported FLM map  
374 entries. Along with Nav\_1, we provided CorRelator with the independently determined  
375 coordinates in multiple csv files for registration and TOI selection (Supplementary Fig. 1).  
376 Subsequently, a Nav\_2 file was generated in CorRelator and reloaded into SerialEM to display  
377 transformed fluorescent squares of interest on the TEM (Supplementary Fig. 2E-G). The rough  
378 transformation supported the identification and recording of cryo-EM frames at a medium  
379 magnification (470x, 399 Å/pixel) covering the square of interest (Supplementary Fig. 2C-E). The  
380 use of TEM images as references to guide additional image processing and registration point  
381 selection of fluorescent maps has two advantages. First, FLM is more tolerant to sample and ice  
382 thickness. Landmarks for registration that are visible with FLM might not be identifiable by TEM.  
383 Thus, starting with and referring to landmark selections on the TEM frames ensure an easy and  
384 accurate selection of matching registration points in both TEM and FLM images. Second,  
385 SerialEM associates acquired TEM maps to the microscope stage with a specific pixel coordinate  
386 to stage position transformation. Changes in pixel coordinates of the TEM map, especially the  
387 map's length and width in pixels, during geometric transformation operations such as cropping,  
388 rotating, and flipping when the map's length and width are not equivalent, could lead to the  
389 marginal misplacement of landmarks by pixels and a subsequent misalignment of the two imaging  
390 modalities. In addition, to minimize pixel changes introduced by imprecise stage shift movements,  
391 we recorded the TEM square maps at a medium low magnification (470x, EFTEM mode, Krios)  
392 where a single frame covered the entire field of view of the square of interest with the support

393 holes clearly visible (Supplementary Fig. 2E, G, H). Thus, no additional blending or stitching of  
394 multiple image tiles was necessary.

395

396 Bead-less alignment based on sample support features visible by lower magnification imaging  
397 modes has been explored for accurate correlation (Anderson et al., 2018; Dahlberg et al., 2020).

398 Multiple independent image analysis tools such as ImageJ/Fiji (Schindelin et al., 2012), MATLAB

399 (MathWorks, Natick, MA, USA; (Kamarianakis et al., 2011)), SerialEM, and SerialEM with the

400 Py-EM plugin (Schorb et al., 2019) have incorporated automated algorithmic functions to detect

401 the edge and centroid of a hole. The hole centroid identification process may be completed in the

402 same fluorescent channel as the TOIs, e.g., the GFP channel for labeled RSV particles, which

403 makes the process less susceptible to misalignments and shifts between multiple frames

404 (Schellenberger et al., 2014). Non-local means filtering can be used to increase the contrast in

405 FLM images with high background signal (Anderson et al., 2018; Buades et al., 2005). To examine

406 possible deviations in alignment between brightfield and fluorescence image frames, we

407 performed the hole identification procedure on filtered fluorescence and brightfield images

408 acquired from the same area. We found that the deviation of the hole centroid coordinates for the

409 same hole between the two modes was tolerable (Supplementary Fig. 3E), with less than 1% of

410 holes exceeding 2-pixel difference (399 Å/pixel). A larger number of usable center coordinates

411 were identified in the brightfield frame (Supplementary Fig. 3D). Following the rough correlation,

412 the local fluorescence images (Fig. 3A) were flipped, rotated, and cropped based on the TEM

413 square counterparts prior to being imported into the Nav\_2 in SerialEM. CorRelator then treated

414 the Nav\_2 as the new Nav\_1 to reinitiate the alignment process (Fig. 3B). Out of the provided hole

415 centroid coordinates from Fiji (Fig. 3C, yellow markers), a set of reference points ( $n = 9$ ) were

416 selected to calculate the matrix  $M$  between the two modalities. After several rounds of iterative  
417 registration and assessment, an overlay of the cryo-FLM and -EM images with the refined  
418 transformation was generated for reliable identification of the TOIs (Fig. 3D).

419

420 CorRelator mapping of TOIs from FLM to TEM can provide updated stage positions for direct  
421 automated cryo-ET tilt series collection. Here, labeled RSV particles were the targets (Fig. 3D).

422 The positioning error of on-the-fly correlation after moving the stage to the predicted position was

423 218.9 nm ( $n = 50$  targets) which was comparable to previous reports (Fu et al., 2019; Schorb et

424 al., 2017). This positioning error was also well within targeting range for cryo-ET data collection

425 at a higher magnification (pixel size of 3~8 Å) (Table 1). Consistent with previous reports

426 (Hampton et al., 2016; Ke, Dillard, et al., 2018; Kiss et al., 2014; Liljeroos et al., 2013),

427 tomographic slices of the RSV particles (Fig. 3G, H) showed that the virus was predominantly

428 filamentous and likely infectious. Regular organization of the surface glycoproteins, matrix protein

429 (M), M2-1, and the ribonucleoprotein complex (RNP) relative to the viral membrane were revealed

430 in linear density profile analysis (Fig. 3G-I). Of note, the nanogold-Alexa488 labeled RSV

431 particles appeared fuzzier than un-labeled RSV released from HeLa cells infected under the same

432 conditions (MOI = 10, 24-hours post infection). An extra layer of density ~23 nm (peak 1) from

433 the viral membrane was observed above the densities attributed to the glycoproteins (~12 nm, peak

434 2) (Fig. 3g-h, I). The extra density was likely due to the secondary antibody nanogold-Alexa488

435 anti-human IgG (~ 12 to 15 nm in length) and contributed to the diffuse appearance.

436

437 All map images were loaded through relative path names indicated in a navigator file. CorRelator

438 operates on the image pixel coordinates for alignment and transformation. It is possible to use

439 noisy unprocessed fluorescence images that have holes visible for hole-centroid registration, and  
440 then to swap with and load a processed fluorescence frame for on-the-fly target identification in  
441 SerialEM. With one consideration, there might be uncertain small changes in pixels between pre-  
442 and post- processed images. When an object is irregular and pleomorphic, such as filamentous  
443 viral particles (Fig. 3E-H, Supplementary Fig. 2I-J), locating fluorescent objects by wide-field  
444 imaging is difficult. Despite the significant advances that have been made in developing stable  
445 cryo-CLEM systems (Brandt et al., 2010; Hampton et al., 2016; Schellenberger et al., 2014; Schorb  
446 et al., 2017; Schorb & Briggs, 2014; van Driel et al., 2009), fluorescent signal from adjacent focus  
447 planes may result in an image with out-of-focus blur that limits details from being observed. To  
448 improve image contrast and resolution, we applied Leica's THUNDER technology to remove  
449 background out-of-focus signal and enhance image contrast. An automated adaptive three-  
450 dimensional (3D) deconvolution method was applied to improve image resolution by restoring the  
451 point spread function (PSF). Here, we investigated RSV assembly sites on the plasma membrane  
452 of the infected cells (Harrison et al., 2010; Ke, Dillard, et al., 2018; Oomens et al., 2006). Labeled  
453 RSV F was resolved along the host plasma membrane and was present on the exterior of released  
454 viral particles (Ke, Dillard, et al., 2018; Oomens et al., 2006; Yi et al., 2015). After small volume  
455 computational clearance (SVCC), the image contrast and resolution were improved  
456 (Supplementary Fig. 4E). As a result, previously undistinguishable viral filaments (Fig. 4A-E)  
457 close to infected cells were observed (Fig. 4B-F). We registered and transformed unprocessed  
458 cryo-FLM (Fig. 4A) and EM images in CorRelator using paired hole centers, followed by  
459 swapping to a post-SVCC frame (Fig. 4B). SVCC processing did not introduce detectable pixel  
460 changes to the original coordinate system of the raw frame (Supplementary Fig. 4E). Correlation  
461 between the post-SVCC fluorescent image and the cryo-EM square map revealed extended viral

462 filaments along the cell plasma membrane (Fig. 4G, Supplementary Fig. 4). Cryo-ET of the same  
463 targets (red and orange stars in Fig. 4G) highlight the spatial organization of viral components  
464 inside the RSV filament at the cell edge (Fig. 4I). The RNP is noted by white arrowheads and the  
465 F glycoprotein along the viral membrane by black arrowheads (Fig. 4I). The full-width at half-  
466 maximum (FWHM) of the PSF in the lateral X and Y directions was improved by 1.5 (n = 10),  
467 consistently with the narrower X-axial intensity distribution (red boxed signal in Supplementary  
468 Fig. 4C-D, F).

469

#### 470 **Accuracy of correlation and error estimation**

471 It has been reported that post-acquisition correlation in the range of 20 to 100 nm is achievable  
472 using TetraSpeck or FluoSphere fiducials combined with the MATLAB linear transformation  
473 function (Anderson et al., 2018; Kukulski et al., 2011; Paul-Gilloteaux et al., 2017; Schellenberger  
474 et al., 2014; Schorb et al., 2017). In addition, on-the-fly relocation precisions of 0.1 to 1 $\mu$ m may  
475 be possible when microscope stage movements are taken into consideration (Fu et al., 2019;  
476 Schorb et al., 2017). Following similar procedures (Anderson et al., 2018; Kukulski et al., 2011;  
477 Schellenberger et al., 2014), the alignment accuracy using paired hole center registration (n  $\geq$  7  
478 pairs) in CorRelator was measured on full cryo-CLEM data sets. With this process, CorRelator  
479 predicted errors of transformation were between 20 and 100 nm. We found that average prediction  
480 errors in X/Y axial directions were 68.6 nm ( $\pm$  42) and 66.8 nm ( $\pm$  52) hole centers were treated  
481 as the objects of interest, and 48.1 nm ( $\pm$  43) and 42.8 nm ( $\pm$  34) for 500 nm TetraSpeck targets  
482 (Table 1, Supplementary Fig. 5A). The slight improvement seen in TetraSpeck prediction, was  
483 likely due to the application of a 2D Gaussian fitting model to detect precise coordinates of the  
484 point-like fluorescent signal (Kukulski et al., 2011; Schellenberger et al., 2014). Next, we tested

485 the on-the-fly target prediction on pleomorphic virus particles. To demonstrate the image  
486 acquisition procedure, we applied a similar methodology (Schorb et al., 2017) and analyzed a set  
487 of 50 images acquired at magnifications of 2,250x (76 Å/pixel) and 19,500x (4.47 Å/pixel). After  
488 performing the transformation with 470x EM images, we moved to the stage positions of the  
489 transformed fluorescent signal and recorded images at 2,250x and 19,500x. For best results in  
490 SerialEM, image shift calibrations should be performed between the registration magnification  
491 (470x), medium magnification (2,250x), and acquisition magnification (19,500x). Taking into  
492 account variations in stage movement, the Euclidian distance between the actual position of the  
493 fluorescent viral particle (pink cross, Fig. 5C-G) and the center of the images (or predicted position,  
494 yellow cross, Fig. 5C-G) was used to estimate the on-the-fly alignment accuracy, as described  
495 previously (Schorb et al., 2017). The mean error of Euclidian distance was 218.9 nm with a  
496 standard deviation of 109 nm, with an average of 160.7 nm in X and 148.6 nm in Y axis (n = 50,  
497 Fig. 6L, Table 1). A maximum prediction error of 605 nm was observed when the hole centroids  
498 over damaged support films were used for image registration (Fig. 5F). The error for positioning  
499 pleomorphic objects fell well within the cryo-EM imaging tolerance range of  $\sim 1.4 \times 1.4 \mu\text{m}$  at a  
500 pixel size of 4.47 Å on a Gatan K3 direct electron detector. The approximate normal distribution  
501 of prediction errors indicated that data acquisition could be conducted with a field of view as small  
502 as 700 nm while still expecting a < 5% off-target rate (Fig. 6L). We noted that on-the-fly accuracy  
503 depended on multiple factors, including registration point selection, stage and image calibrations  
504 between magnifications on the TEM, and the intensity and resolution of the fluorescent signals in  
505 FLM images. We obtained consistent targeting precision when stage and image shifts were  
506 calibrated at the magnifications used for correlation in SerialEM (Mastronarde, 2005).

507

508 We also compared the transformation of CorRelator to standard MATLAB affine and projective  
509 geometric functions that have been used for consistent high accuracy correlation (Fu et al., 2019;  
510 Kukulski et al., 2011; Schellenberger et al., 2014; Schorb et al., 2017) and eC-CLEM (Paul-  
511 Gilloteaux et al., 2017). For comparison, the identical set of paired hole centroids ( $n = 7$  to 10) on  
512 cryo-FLM and cryo-EM images were used for registration while the prediction errors were  
513 measured on the same coordinates for fluorescent RSV particles. CorRelator performed  
514 equivalently to the MATLAB Affine Transformation and eC-CLEM Rigid Transformation that  
515 corrects translation, rotation, scaling, and shearing, the performance of which was comparable to,  
516 and slightly better than, MATLAB's Projective Transformation function (Supplementary Fig. 5B,  
517 Fig. 7B; (Paul-Gilloteaux et al., 2017)). Application of the coordinate transform from cryo-FLM  
518 to TEM showed excellent overlap between hole centroids (Supplementary Fig. 5C-D). We  
519 demonstrated that CorRelator can handle moderate grid bending that may be introduced during the  
520 handling of cryo-grids (Supplementary Fig. 2).

521

### 522 **Adaptability of the workflow**

523 To assess CorRelator integration with room temperature FLM-EM correlative imaging schemes,  
524 we used TetraSpeck-coated EM Finder grids and conducted room-temperature FLM-EM  
525 correlations. We designed this prototype application to determine the: (1) potential adaptability of  
526 CorRelator for customized applications; and (2) alignment accuracy through hole center  
527 registration in the absence of cryogenic handling and thermal stage drift observed with cryo-  
528 fluorescence microscopy systems.

529



530 The number of 100 nm TetraSpeck beads was optimized to roughly 5~15 beads per square of an  
531 EM Finder grid (Schellenberger et al., 2014). A multi-channel automated scan of the whole grid  
532 was performed by Micro-Manager (Edelstein et al., 2010) on an inverted DMi8 microscope at 40x  
533 (40 x, 0.6 NA, dry, Leica). The scanned tiles were stitched together to generate a single FLM  
534 specimen frame for grid-wide rough correlation (Fig. 6A, Supplementary Fig. 2 Step 1). A higher  
535 NA oil-immersion objective (63 x, 1.4 NA, oil-immersion, Leica) was used to record single square  
536 frames of areas with a good bead distribution. The GFP channel square frame either went through  
537 hole center identification (Fig. 6B) or a 2D Gaussian fitting to determine precise bead coordinates  
538 (Schellenberger et al., 2014). The same grid was then loaded onto a Tecnai T12 microscope  
539 (ThermoScientific, Hillsboro, OR, USA) and a whole grid montage and associated navigator file  
540 (Nav\_1) were written out by SerialEM. The rough correlation on the grid-level was done as  
541 described above (Supplementary Fig. 2 Step 1), followed by the TEM square image collection.

542  
543 For fine correlation (Supplementary Fig. 2 Step 3), we used the hole center coordinates of FLM  
544 and EM, that were externally identified with Hough Circle Transform in Fiji, and refined by the  
545 user prior to being transformed into stage positions in CorRelator (Route 2 in Fig. 1), referred to  
546 as Approach 1. We could also directly mark the hole centers as stage positions on the TEM (not  
547 applicable to the FLM image) using the SerialEM ‘Add Grid of Points’ function (Fig. 6C) based  
548 on the unguided manual lattice pattern prediction. We referred to this hybrid point-selection  
549 approach as Approach 2. In both cases, one-to-one hole-center based registration between the FLM  
550 and EM was determined, followed by a transformation in SerialEM using its ‘Transform’ function.  
551 We verified the success of the on-the-fly correlation by analyzing the acquired image sets after  
552 moving the stage to the predicted positions of the 100 nm beads treated as the TOIs here (Fig. 6).

553 In Approach 1, the mean displacement of the beads was 40.8 nm ( $n = 19$ , S.D. = 18 nm, Fig. 6F-  
554 L, Table 2), while the Euclidian deviation of the positions of the beads from the center of the  
555 images was 120 nm ( $n = 19$ , S.D. = 32 nm, Table 2) in the hybrid Approach 2. The smaller  
556 prediction errors in the first scenario suggested the practical necessity of combining automated  
557 algorithmic approaches and user interaction. Overall, we show that CorRelator may be adapted for  
558 use with many microscope systems and is sufficiently flexible to be incorporated into common  
559 SerialEM operations to achieve consistent high accuracy correlation.

560

## 561 **Discussion**

562 The diversity of FLM and cryo-FLM modalities in combination with TEM has led to advances in  
563 workflow and software development (Supplementary Table 1). Here, we introduce a new flexible  
564 CLEM application tool, CorRelator (Fig. 1, Supplementary Fig. 6), that can be coupled with  
565 SerialEM for TEM data collection. We developed CorRelator to facilitate the integration of high-  
566 precision target identification by FLM with automated high-throughput cryo-EM/ET data  
567 collection. Using the interactive hole centroids-based alignment, we demonstrate that CorRelator  
568 is able to achieve and improve the standard bead-aided prediction error of 20 to 100 nm for 2D  
569 post-acquisition cryo-correlation, and 100 to 700 nm relocation precision for on-the-fly cryo-  
570 EM/ET acquisition. We explored the use of advanced image processing steps in regular cryo-  
571 CLEM workflows, such as computational cleaning and 3D deconvolution approaches. Due to its  
572 simplicity, we show that CorRelator could be adapted to any existing FLM, cryo-FLM, or TEM  
573 system, expanding the scope of correlative microscopy. CorRelator aims to bridge between cryo-  
574 FLM and on-the-fly cryo-EM for an easy and accurate transition. This means that the main tasks

575 in building a correlative imaging pipeline to support automated cryo-EM/ET data collection is now  
576 reduced to user-specific experimental designs and unambiguous TOI identification.

577

578 To achieve high-accuracy correlation with CorRelator, no specialized hardware requirements are  
579 needed for the FLM and TEM microscopes and cameras. Good microscope column alignment and  
580 camera calibrations ensure a good, nonradical transformation estimation from 3-D to 2-D, from  
581 the real object space (to camera coordinates) to image (film) space, then to pixel coordinates  
582 displayed on the screen (Gonzalez & Woods, 2002; Szeliski, 2011). Good SerialEM calibrations  
583 on the TEM that support Navigator usage makes stage movement and image acquisition more  
584 robust. Experiments were performed with a Titan Krios, Tecnai TF30 (data not shown), Tecnai  
585 T12, and Talos L120C (data not shown). CorRelator's transformation performance has not been  
586 tested on plastic-embedded or high-pressure frozen/freeze substituted samples (Kukulski et al.,  
587 2011; Paul-Gilloteaux et al., 2017) where larger structural changes and sample deformations can  
588 occur that may require dedicated transformation parameter selection (Paul-Gilloteaux et al., 2017).

589

590 We compared the 2D transformation performance of CorRelator to the registration/correlation  
591 functions in MATLAB (Fu et al., 2019; Kukulski et al., 2011; Schellenberger et al., 2014; Schorb  
592 et al., 2017) and eC-CLEM (Paul-Gilloteaux et al., 2017) (Supplementary Fig. 5B, 7B). We  
593 adopted the linear closed-form ordinary least square (OLS) solution to an overdetermined system  
594 (Horn, 1987). The use of closed-form least square normal method has two main advantages. It is  
595 preferred over manual and semi-automated point-matching registration where a "smaller" set of  
596 paired reference points are usually provided, speeding up the matrix computing and calculation.  
597 Second, it limits unnecessary liberty in a non-rigid, non-linear transform that could warp and

598 distort images that lead to increased target registration error in correlation (Supplementary Fig.  
599 5B, Fig. 7B; Paul-Gilloteaux et al., 2017).

600

601 The closed-form solution and non-linear product transformation require at least four reference  
602 points to avoid a singular/coplanar matrix, as is always the case when there are only three reference  
603 coordinates between two coordinate systems (Gonzalez & Woods, 2002; Horn, 1987). To validate  
604 the variance in transformation performance caused by selection of alignment markers, we used a  
605 set of five reference coordinate pairs of hole centroids, defined either locally within a bounding  
606 area of ~3% of the entire field of view, or across the entire image spanning roughly 50%, to obtain  
607 the transformation matrices in CorRelator, MATLAB (affine and projective transformation), and  
608 eC-CLEM (rigid transformation). The calculated matrices were then applied to the same set of  
609 TOIs (leave-out-one, non-registration hole centroids) to obtain the prediction errors. We found that  
610  $n \geq 5$  reference coordinate pairs were able to achieve an overall high-accuracy cryo-FLM-to-TEM  
611 coordinate correlation when the registration pairs were roughly distributed across 50% of the entire  
612 image (Supplementary Fig. 5D). The prediction error for TOIs that were closer to the picked  
613 reference coordinates were smaller than those farther away. Increasing the number of local  
614 reference coordinates marginally improved the prediction error. We note that more uniformly  
615 distributed reference coordinates help obtain an optimum cryo-FLM-to-TEM correlation.  
616 Compared to fluorescent bead-aided alignment, the distribution of holes is regular, uniform, and  
617 abundant by nature, more tolerable to prediction error caused by mis-position of reference pairs.

618

619 There is an increasing need for fast, accurate, and automated correlative registration for higher  
620 throughput. We validated the potential improvements that CorRelator can provide in robust

621 alignments using highly interactive workflows. After importing algorithmically-determined  
622 external coordinates, the GUI-driven manual registration and image viewing assessment supports  
623 users during registration point reassignment and editing. This feature is essential for areas that  
624 contain many TOIs but may lack registration accuracy. A recent report on cryo-super resolution  
625 CLEM has shown that the most robust and accurate registrations are from manual hole center  
626 identifications, as opposed to purely algorithmic approaches (Dahlberg et al., 2020). CorRelator  
627 directly supports iterative and manual selections. Further developments in CorRelator to extend  
628 and enhance its capabilities will include: image analysis tools and workflows to support cryo-  
629 FLM-FIB-milling (Arnold et al., 2016; Gorelick et al., 2019; Hsieh et al., 2014; Michael Marko et  
630 al., 2007; M. Marko et al., 2006; Rigort et al., 2010; Zachs et al., 2020).

631 **References**

- 632 Agronskaia, A. V., Valentijn, J. A., van Driel, L. F., Schneijdenberg, C. T. W. M., Humbel, B.  
633 M., van Bergen en Henegouwen, P. M. P., Verkleij, A. J., Koster, A. J., & Gerritsen, H.  
634 C. (2008). Integrated fluorescence and transmission electron microscopy. *Journal of*  
635 *Structural Biology*, 164(2), 183–189. <https://doi.org/10.1016/j.jsb.2008.07.003>
- 636 Andersen, M., Barker, B., Chou, A., Diggory, M., Donkin, R., O'Brien, T., Maisonobe, L.,  
637 Pietschmann, J., Pourbaix, D., Steitz, P., & Worden, B. (n.d.). *Commons math: The*  
638 *apache commons mathematics library*. Retrieved August 1, 2016, from [http://commons.](http://commons.apache.org/math/)  
639 [apache.org/math/](http://commons.apache.org/math/), online. 2011
- 640 Anderson, K. L., Page, C., Swift, M. F., Hanein, D., & Volkmann, N. (2018). Marker-free  
641 method for accurate alignment between correlated light, cryo-light, and electron cryo-  
642 microscopy data using sample support features. *Journal of Structural Biology*, 201(1),  
643 46–51. <https://doi.org/10.1016/j.jsb.2017.11.001>
- 644 Arnold, J., Mahamid, J., Lucic, V., de Marco, A., Fernandez, J.-J., Laugks, T., Mayer, T.,  
645 Hyman, A. A., Baumeister, W., & Plitzko, J. M. (2016). Site-Specific Cryo-focused Ion  
646 Beam Sample Preparation Guided by 3D Correlative Microscopy. *Biophysical Journal*,  
647 110(4), 860–869. <https://doi.org/10.1016/j.bpj.2015.10.053>
- 648 Bharat, T. A. M., Kureisaite-Ciziene, D., Hardy, G. G., Yu, E. W., Devant, J. M., Hagen, W. J.  
649 H., Brun, Y. V., Briggs, J. A. G., & Löwe, J. (2017). Structure of the hexagonal surface  
650 layer on *Caulobacter crescentus* cells. *Nature Microbiology*, 2(7), 17059.  
651 <https://doi.org/10.1038/nmicrobiol.2017.59>

- 652 Brandt, F., Carlson, L.-A., Hartl, F. U., Baumeister, W., & Grunewald, K. (2010). The Three-  
653 Dimensional Organization of Polyribosomes in Intact Human Cells. *Molecular Cell*,  
654 *39*(4), 560–569. <https://doi.org/10.1016/j.molcel.2010.08.003>
- 655 Briegel, A., Chen, S., Koster, A. J., Plitzko, J. M., Schwartz, C. L., & Jensen, G. J. (2010).  
656 Correlated Light and Electron Cryo-Microscopy. In *Methods in Enzymology* (Vol. 481,  
657 pp. 317–341). Elsevier. [https://doi.org/10.1016/S0076-6879\(10\)81013-4](https://doi.org/10.1016/S0076-6879(10)81013-4)
- 658 Briggs, J. A. (2013). Structural biology in situ—The potential of subtomogram averaging.  
659 *Current Opinion in Structural Biology*, *23*(2), 261–267.  
660 <https://doi.org/10.1016/j.sbi.2013.02.003>
- 661 Buades, A., Coll, B., & Morel, J.-M. (2005). A Non-Local Algorithm for Image Denoising. *2005*  
662 *IEEE Computer Society Conference on Computer Vision and Pattern Recognition*  
663 *(CVPR'05)*, *2*, 60–65. <https://doi.org/10.1109/CVPR.2005.38>
- 664 Canny, J. (1986). A computational approach to edge detection. *IEEE Transactions on Pattern*  
665 *Analysis and Machine Intelligence*, *8*(6), 679–698.
- 666 Castleman, K. R. (1995). *Digital Image Processing* (Third).
- 667 Chang, Y.-W., Chen, S., Tocheva, E. I., Treuner-Lange, A., Löbach, S., Søgaard-Andersen, L.,  
668 & Jensen, G. J. (2014). Correlated cryogenic photoactivated localization microscopy and  
669 cryo-electron tomography. *Nature Methods*, *11*(7), 737–739.  
670 <https://doi.org/10.1038/nmeth.2961>
- 671 Cheutin, T., Sauvage, C., Tchélidzé, P., O'Donohue, M. F., Kaplan, H., Beorchia, A., & Ploton,  
672 D. (2007). Visualizing Macromolecules with Fluoronanogold: From Photon Microscopy  
673 to Electron Tomography. In *Methods in Cell Biology* (Vol. 79, pp. 559–574). Elsevier.  
674 [https://doi.org/10.1016/S0091-679X\(06\)79022-7](https://doi.org/10.1016/S0091-679X(06)79022-7)

- 675 Dahlberg, P. D., Saurabh, S., Sartor, A. M., Wang, J., Mitchell, P. G., Chiu, W., Shapiro, L., &  
676 Moerner, W. E. (2020). Cryogenic single-molecule fluorescence annotations for electron  
677 tomography reveal in situ organization of key proteins in *Caulobacter*. *Proceedings of*  
678 *the National Academy of Sciences*, 202001849. <https://doi.org/10.1073/pnas.2001849117>
- 679 Dick, R. A., Xu, C., Morado, D. R., Kravchuk, V., Ricana, C. L., Lyddon, T. D., Broad, A. M.,  
680 Feathers, J. R., Johnson, M. C., Vogt, V. M., Perilla, J. R., Briggs, J. A. G., & Schur, F.  
681 K. M. (2020). Structures of immature EIAV Gag lattices reveal a conserved role for IP6  
682 in lentivirus assembly. *PLOS Pathogens*, 16(1), e1008277.  
683 <https://doi.org/10.1371/journal.ppat.1008277>
- 684 Edelstein, A., Amodaj, N., Hoover, K., Vale, R., & Stuurman, N. (2010). Computer Control of  
685 Microscopes Using  $\mu$ Manager. *Current Protocols in Molecular Biology*, 92(1).  
686 <https://doi.org/10.1002/0471142727.mb1420s92>
- 687 Edelstein, A., Tsuchida, M. A., Amodaj, N., Pinkard, H., Vale, R. D., & Stuurman, N. (2014).  
688 Advanced methods of microscope control using  $\mu$ Manager software. *Journal of*  
689 *Biological Methods*, 1(2), 10. <https://doi.org/10.14440/jbm.2014.36>
- 690 Erlendsson, S., Morado, D. R., Cullen, H. B., Feschotte, C., Shepherd, J. D., & Briggs, J. A. G.  
691 (2020). Structures of virus-like capsids formed by the *Drosophila* neuronal Arc proteins.  
692 *Nature Neuroscience*, 23(2), 172–175. <https://doi.org/10.1038/s41593-019-0569-y>
- 693 Faas, F. G. A., Bárcena, M., Agronskaia, A. V., Gerritsen, H. C., Moscicka, K. B., Diebold, C.  
694 A., van Driel, L. F., Limpens, R. W. A. L., Bos, E., Ravelli, R. B. G., Koning, R. I., &  
695 Koster, A. J. (2013). Localization of fluorescently labeled structures in frozen-hydrated  
696 samples using integrated light electron microscopy. *Journal of Structural Biology*,  
697 181(3), 283–290. <https://doi.org/10.1016/j.jsb.2012.12.004>



- 698 Fu, X., Ning, J., Zhong, Z., Ambrose, Z., Charles Watkins, S., & Zhang, P. (2019). AutoCLEM:  
699 An Automated Workflow for Correlative Live-Cell Fluorescence Microscopy and Cryo-  
700 Electron Tomography. *Scientific Reports*, *9*(1), 19207. [https://doi.org/10.1038/s41598-](https://doi.org/10.1038/s41598-019-55766-8)  
701 [019-55766-8](https://doi.org/10.1038/s41598-019-55766-8)
- 702 Gonzalez, R. C., & Woods, R. E. (2002). *Digital Image Processing* (Second). Prentice Hall.
- 703 Gorelick, S., Buckley, G., Gervinskias, G., Johnson, T. K., Handley, A., Caggiano, M. P.,  
704 Whisstock, J. C., Pocock, R., & de Marco, A. (2019). PIE-scope, integrated cryo-  
705 correlative light and FIB/SEM microscopy. *ELife*, *8*, e45919.  
706 <https://doi.org/10.7554/eLife.45919>
- 707 Hampton, C. M., Strauss, J. D., Ke, Z., Dillard, R. S., Hammonds, J. E., Alonas, E., Desai, T. M.,  
708 Marin, M., Storms, R. E., Leon, F., Melikyan, G. B., Santangelo, P. J., Spearman, P. W.,  
709 & Wright, E. R. (2016). Correlated fluorescence microscopy and cryo-electron  
710 tomography of virus-infected or transfected mammalian cells. *Nature Protocols*, *12*(1),  
711 150–167. <https://doi.org/10.1038/nprot.2016.168>
- 712 Harrison, M. S., Sakaguchi, T., & Schmitt, A. P. (2010). Paramyxovirus assembly and budding:  
713 Building particles that transmit infections. *The International Journal of Biochemistry &*  
714 *Cell Biology*, *42*(9), 1416–1429. <https://doi.org/10.1016/j.biocel.2010.04.005>
- 715 Horn, B. K. P. (1987). Closed-form solution of absolute orientation using unit quaternions.  
716 *Journal of the Optical Society of America A*, *4*(4), 629.  
717 <https://doi.org/10.1364/JOSAA.4.000629>
- 718 Hotard, A. L., Shaikh, F. Y., Lee, S., Yan, D., Teng, M. N., Plemper, R. K., Crowe, J. E., &  
719 Moore, M. L. (2012). A stabilized respiratory syncytial virus reverse genetics system

- 720           amenable to recombination-mediated mutagenesis. *Virology*, 434(1), 129–136.
- 721           <https://doi.org/10.1016/j.virol.2012.09.022>
- 722 Hsieh, C., Schmelzer, T., Kishchenko, G., Wagenknecht, T., & Marko, M. (2014). Practical  
723           workflow for cryo focused-ion-beam milling of tissues and cells for cryo-TEM  
724           tomography. *Journal of Structural Biology*, 185(1), 32–41.  
725           <https://doi.org/10.1016/j.jsb.2013.10.019>
- 726 Illingworth, J., & Kittler, J. (1987). The Adaptive Hough Transform. *IEEE Transactions on*  
727           *Pattern Analysis and Machine Intelligence*, PAMI-9(5), 690–698.  
728           <https://doi.org/10.1109/TPAMI.1987.4767964>
- 729 Jun, S., Ke, D., Debiec, K., Zhao, G., Meng, X., Ambrose, Z., Gibson, G. A., Watkins, S. C., &  
730           Zhang, P. (2011). Direct Visualization of HIV-1 with Correlative Live-Cell Microscopy  
731           and Cryo-Electron Tomography. *Structure*, 19(11), 1573–1581.  
732           <https://doi.org/10.1016/j.str.2011.09.006>
- 733 Jun, S., Ro, H.-J., Bharda, A., Kim, S. I., Jeoung, D., & Jung, H. S. (2019). Advances in Cryo-  
734           Correlative Light and Electron Microscopy: Applications for Studying Molecular and  
735           Cellular Events. *The Protein Journal*, 38(6), 609–615. [https://doi.org/10.1007/s10930-](https://doi.org/10.1007/s10930-019-09856-1)  
736           019-09856-1
- 737 Kamarianakis, Z., Buliev, I., & Pallikarakis, N. (2011). Robust identification and localization of  
738           intramedullary nail holes for distal locking using CBCT: A simulation study. *Medical*  
739           *Engineering & Physics*, 33(4), 479–489.  
740           <https://doi.org/10.1016/j.medengphy.2010.11.016>
- 741 Kaufmann, R., Schellenberger, P., Seiradake, E., Dobbie, I. M., Jones, E. Y., Davis, I., Hagen,  
742           C., & Grünewald, K. (2014). Super-Resolution Microscopy Using Standard Fluorescent

- 743 Proteins in Intact Cells under Cryo-Conditions. *Nano Letters*, *14*(7), 4171–4175.  
744 <https://doi.org/10.1021/nl501870p>
- 745 Ke, Z., Dillard, R. S., Chirkova, T., Leon, F., Stobart, C. C., Hampton, C. M., Strauss, J. D.,  
746 Rajan, D., Rostad, C. A., Taylor, J. V., Yi, H., Shah, R., Jin, M., Hartert, T. V., Peebles,  
747 R. S., Graham, B. S., Moore, M. L., Anderson, L. J., & Wright, E. R. (2018). The  
748 Morphology and Assembly of Respiratory Syncytial Virus Revealed by Cryo-Electron  
749 Tomography. *Viruses*, *10*(8). <https://doi.org/10.3390/v10080446>
- 750 Ke, Z., Strauss, J. D., Hampton, C. M., Brindley, M. A., Dillard, R. S., Leon, F., Lamb, K. M.,  
751 Plemper, R. K., & Wright, E. R. (2018). Promotion of virus assembly and organization by  
752 the measles virus matrix protein. *Nature Communications*, *9*(1), 1736.  
753 <https://doi.org/10.1038/s41467-018-04058-2>
- 754 Kiss, G., Holl, J. M., Williams, G. M., Alonas, E., Vanover, D., Lifland, A. W., Gudheti, M.,  
755 Guerrero-Ferreira, R. C., Nair, V., Yi, H., Graham, B. S., Santangelo, P. J., & Wright, E.  
756 R. (2014). Structural Analysis of Respiratory Syncytial Virus Reveals the Position of M2-  
757 1 between the Matrix Protein and the Ribonucleoprotein Complex. *Journal of Virology*,  
758 *88*(13), 7602–7617. <https://doi.org/10.1128/JVI.00256-14>
- 759 Koning, R. I., Celler, K., Willemsse, J., Bos, E., van Wezel, G. P., & Koster, A. J. (2014).  
760 Correlative Cryo-Fluorescence Light Microscopy and Cryo-Electron Tomography of  
761 Streptomyces. In *Methods in Cell Biology* (Vol. 124, pp. 217–239). Elsevier.  
762 <https://doi.org/10.1016/B978-0-12-801075-4.00010-0>
- 763 Koster, A. J., & Grünewald, K. (2014). Editorial on Correlative microscopy. *Ultramicroscopy*,  
764 *143*, 1–2. <https://doi.org/10.1016/j.ultramic.2014.03.010>

- 765 Kovtun, O., Leneva, N., Bykov, Y. S., Ariotti, N., Teasdale, R. D., Schaffer, M., Engel, B. D.,  
766 Owen, David. J., Briggs, J. A. G., & Collins, B. M. (2018). Structure of the membrane-  
767 assembled retromer coat determined by cryo-electron tomography. *Nature*, *561*(7724),  
768 561–564. <https://doi.org/10.1038/s41586-018-0526-z>
- 769 Kremer, J. R., Mastronarde, D. N., & McIntosh, J. R. (1996). Computer visualization of three-  
770 dimensional image data using IMOD. *Journal of Structural Biology*, *116*(1), 71–76.  
771 <https://doi.org/10.1006/jsbi.1996.0013>
- 772 Kukulski, W., Schorb, M., Welsch, S., Picco, A., Kaksonen, M., & Briggs, J. A. G. (2011).  
773 Correlated fluorescence and 3D electron microscopy with high sensitivity and spatial  
774 precision. *The Journal of Cell Biology*, *192*(1), 111–119.  
775 <https://doi.org/10.1083/jcb.201009037>
- 776 Li, S., Ji, G., Shi, Y., Klausen, L. H., Niu, T., Wang, S., Huang, X., Ding, W., Zhang, X., Dong,  
777 M., Xu, W., & Sun, F. (2018). High-vacuum optical platform for cryo-CLEM (HOPE): A  
778 new solution for non-integrated multiscale correlative light and electron microscopy.  
779 *Journal of Structural Biology*, *201*(1), 63–75. <https://doi.org/10.1016/j.jsb.2017.11.002>
- 780 Liljeroos, L., Krzyzaniak, M. A., Helenius, A., & Butcher, S. J. (2013). Architecture of  
781 respiratory syncytial virus revealed by electron cryotomography. *Proceedings of the*  
782 *National Academy of Sciences*, *110*(27), 11133–11138.  
783 <https://doi.org/10.1073/pnas.1309070110>
- 784 Liu, B., Xue, Y., Zhao, W., Chen, Y., Fan, C., Gu, L., Zhang, Y., Zhang, X., Sun, L., Huang, X.,  
785 Ding, W., Sun, F., Ji, W., & Xu, T. (2015). Three-dimensional super-resolution protein  
786 localization correlated with vitrified cellular context. *Scientific Reports*, *5*(1), 13017.  
787 <https://doi.org/10.1038/srep13017>

- 788 Lučić, V., Kossel, A. H., Yang, T., Bonhoeffer, T., Baumeister, W., & Sartori, A. (2007).  
789 Multiscale imaging of neurons grown in culture: From light microscopy to cryo-electron  
790 tomography. *Journal of Structural Biology*, *160*(2), 146–156.  
791 <https://doi.org/10.1016/j.jsb.2007.08.014>
- 792 Lučić, V., Rigort, A., & Baumeister, W. (2013). Cryo-electron tomography: The challenge of  
793 doing structural biology in situ. *The Journal of Cell Biology*, *202*(3), 407–419.  
794 <https://doi.org/10.1083/jcb.201304193>
- 795 Luque, D., & Castón, J. R. (2020). Cryo-electron microscopy for the study of virus assembly.  
796 *Nature Chemical Biology*, *16*(3), 231–239. <https://doi.org/10.1038/s41589-020-0477-1>
- 797 Marko, M., Hsieh, C., Moberlychan, W., Mannella, C. A., & Frank, J. (2006). Focused ion beam  
798 milling of vitreous water: Prospects for an alternative to cryo-ultramicrotomy of frozen-  
799 hydrated biological samples. *Journal of Microscopy*, *222*(1), 42–47.  
800 <https://doi.org/10.1111/j.1365-2818.2006.01567.x>
- 801 Marko, Michael, Hsieh, C., Schalek, R., Frank, J., & Mannella, C. (2007). Focused-ion-beam  
802 thinning of frozen-hydrated biological specimens for cryo-electron microscopy. *Nature*  
803 *Methods*, *4*(3), 215–217. <https://doi.org/10.1038/nmeth1014>
- 804 Mastronarde, D. N. (2005). Automated electron microscope tomography using robust prediction  
805 of specimen movements. *Journal of Structural Biology*, *152*(1), 36–51.  
806 <https://doi.org/10.1016/j.jsb.2005.07.007>
- 807 Moser, F., Pražák, V., Mordhorst, V., Andrade, D. M., Baker, L. A., Hagen, C., Grünewald, K.,  
808 & Kaufmann, R. (2019). Cryo-SOFI enabling low-dose super-resolution correlative light  
809 and electron cryo-microscopy. *Proceedings of the National Academy of Sciences*,  
810 *116*(11), 4804–4809. <https://doi.org/10.1073/pnas.1810690116>

- 811 Nahmani, M., Lanahan, C., DeRosier, D., & Turrigiano, G. G. (2017). High-numerical-aperture  
812 cryogenic light microscopy for increased precision of superresolution reconstructions.  
813 *Proceedings of the National Academy of Sciences*, *114*(15), 3832–3836.  
814 <https://doi.org/10.1073/pnas.1618206114>
- 815 Oomens, A. G. P., Bevis, K. P., & Wertz, G. W. (2006). The Cytoplasmic Tail of the Human  
816 Respiratory Syncytial Virus F Protein Plays Critical Roles in Cellular Localization of the  
817 F Protein and Infectious Progeny Production. *Journal of Virology*, *80*(21), 10465–10477.  
818 <https://doi.org/10.1128/JVI.01439-06>
- 819 Paul-Gilloteaux, P., Heiligenstein, X., Belle, M., Domart, M.-C., Larijani, B., Collinson, L.,  
820 Raposo, G., & Salamero, J. (2017). eC-CLEM: Flexible multidimensional registration  
821 software for correlative microscopies. *Nature Methods*, *14*(2), 102–103.  
822 <https://doi.org/10.1038/nmeth.4170>
- 823 Rigort, A., Bäuerlein, F. J. B., Leis, A., Gruska, M., Hoffmann, C., Laugks, T., Böhm, U.,  
824 Eibauer, M., Gnaegi, H., Baumeister, W., & Plitzko, J. M. (2010). Micromachining tools  
825 and correlative approaches for cellular cryo-electron tomography. *Journal of Structural*  
826 *Biology*, *172*(2), 169–179. <https://doi.org/10.1016/j.jsb.2010.02.011>
- 827 Sartori-Rupp, A., Cordero Cervantes, D., Pepe, A., Gousset, K., Delage, E., Corroyer-Dulmont,  
828 S., Schmitt, C., Krijnse-Locker, J., & Zurzolo, C. (2019). Correlative cryo-electron  
829 microscopy reveals the structure of TNTs in neuronal cells. *Nature Communications*,  
830 *10*(1), 342. <https://doi.org/10.1038/s41467-018-08178-7>
- 831 Schellenberger, P., Kaufmann, R., Siebert, C. A., Hagen, C., Wodrich, H., & Grünewald, K.  
832 (2014). High-precision correlative fluorescence and electron cryo microscopy using two

- 833 independent alignment markers. *Ultramicroscopy*, *143*, 41–51.
- 834 <https://doi.org/10.1016/j.ultramic.2013.10.011>
- 835 Schindelin, J., Arganda-Carreras, I., Frise, E., Kaynig, V., Longair, M., Pietzsch, T., Preibisch,  
836 S., Rueden, C., Saalfeld, S., Schmid, B., Tinevez, J.-Y., White, D. J., Hartenstein, V.,  
837 Eliceiri, K., Tomancak, P., & Cardona, A. (2012). Fiji: An open-source platform for  
838 biological-image analysis. *Nature Methods*, *9*(7), 676–682.
- 839 <https://doi.org/10.1038/nmeth.2019>
- 840 Schorb, M., & Briggs, J. A. G. (2014). Correlated cryo-fluorescence and cryo-electron  
841 microscopy with high spatial precision and improved sensitivity. *Ultramicroscopy*, *143*,  
842 24–32. <https://doi.org/10.1016/j.ultramic.2013.10.015>
- 843 Schorb, M., Gaechter, L., Avinoam, O., Sieckmann, F., Clarke, M., Bebeacua, C., Bykov, Y. S.,  
844 Sonnen, A. F.-P., Lihl, R., & Briggs, J. A. G. (2017). New hardware and workflows for  
845 semi-automated correlative cryo-fluorescence and cryo-electron microscopy/tomography.  
846 *Journal of Structural Biology*, *197*(2), 83–93. <https://doi.org/10.1016/j.jsb.2016.06.020>
- 847 Schorb, M., Haberbosch, I., Hagen, W. J. H., Schwab, Y., & Mastronarde, D. N. (2019).  
848 Software tools for automated transmission electron microscopy. *Nature Methods*, *16*(6),  
849 471–477. <https://doi.org/10.1038/s41592-019-0396-9>
- 850 Schwartz, C. L., Sarbash, V. I., Ataulakhanov, F. I., McIntosh, J. R., & Nicastro, D. (2007).  
851 Cryo-fluorescence microscopy facilitates correlations between light and cryo-electron  
852 microscopy and reduces the rate of photobleaching. *Journal of Microscopy*, *227*(2), 98–  
853 109. <https://doi.org/10.1111/j.1365-2818.2007.01794.x>

- 854 Strauss, J. D., Hammonds, J. E., Yi, H., Ding, L., Spearman, P., & Wright, E. R. (2015). Three-  
855 Dimensional Structural Characterization of HIV-1 Tethered to Human Cells. *Journal of*  
856 *Virology*, *90*(3), 1507–1521. <https://doi.org/10.1128/JVI.01880-15>
- 857 Strnad, M., Elsterová, J., Schrenková, J., Vancová, M., Rego, R. O. M., Grubhoffer, L., &  
858 Nebesářová, J. (2015). Correlative cryo-fluorescence and cryo-scanning electron  
859 microscopy as a straightforward tool to study host-pathogen interactions. *Scientific*  
860 *Reports*, *5*(1), 18029. <https://doi.org/10.1038/srep18029>
- 861 Szeliski, R. (2011). *Computer vision: Algorithms and applications*. Springer.
- 862 Tang, G., Peng, L., Baldwin, P. R., Mann, D. S., Jiang, W., Rees, I., & Ludtke, S. J. (2007).  
863 EMAN2: An extensible image processing suite for electron microscopy. *Journal of*  
864 *Structural Biology*, *157*(1), 38–46. <https://doi.org/10.1016/j.jsb.2006.05.009>
- 865 van Driel, L. F., Valentijn, J. A., Valentijn, K. M., Koning, R. I., & Koster, A. J. (2009). Tools  
866 for correlative cryo-fluorescence microscopy and cryo-electron tomography applied to  
867 whole mitochondria in human endothelial cells. *European Journal of Cell Biology*,  
868 *88*(11), 669–684. <https://doi.org/10.1016/j.ejcb.2009.07.002>
- 869 Wan, W., Kolesnikova, L., Clarke, M., Koehler, A., Noda, T., Becker, S., & Briggs, J. A. G.  
870 (2017). Structure and assembly of the Ebola virus nucleocapsid. *Nature*, *551*(7680), 394–  
871 397. <https://doi.org/10.1038/nature24490>
- 872 Wolff, G., Hagen, C., Grünewald, K., & Kaufmann, R. (2016). Towards correlative super-  
873 resolution fluorescence and electron cryo-microscopy: Towards super-resolution cryo-  
874 CLEM. *Biology of the Cell*, *108*(9), 245–258. <https://doi.org/10.1111/boc.201600008>
- 875 Yi, H., Strauss, J. D., Ke, Z., Alonas, E., Dillard, R. S., Hampton, C. M., Lamb, K. M.,  
876 Hammonds, J. E., Santangelo, P. J., Spearman, P. W., & Wright, E. R. (2015). Native



- 877 Immunogold Labeling of Cell Surface Proteins and Viral Glycoproteins for Cryo-  
878 Electron Microscopy and Cryo-Electron Tomography Applications. *Journal of*  
879 *Histochemistry & Cytochemistry*, 63(10), 780–792.  
880 <https://doi.org/10.1369/0022155415593323>
- 881 Zachs, T., Schertel, A., Medeiros, J., Weiss, G. L., Hugener, J., Matos, J., & Pilhofer, M. (2020).  
882 Fully automated, sequential focused ion beam milling for cryo-electron tomography.  
883 *ELife*, 9, e52286. <https://doi.org/10.7554/eLife.52286>
- 884 Zhang, P. (2013). Correlative cryo-electron tomography and optical microscopy of cells. *Current*  
885 *Opinion in Structural Biology*, 23(5), 763–770. <https://doi.org/10.1016/j.sbi.2013.07.017>  
886

## 887 **Acknowledgements**

888 We thank Dr. Larry J. Anderson and Dr. Binh Ha in the Department of Pediatrics, Emory  
889 University for generously sharing motavizumab (primary antibody against respiratory syncytial  
890 virus glycoprotein F). We thank Dr. Louise Bertrand and Dr. Vikram Kohli for sharing light  
891 microscopy and cryo-FLM experience and supporting the Leica THUNDER SVCC hardware. This  
892 work was supported in part by the University of Wisconsin, Madison, the Department of  
893 Biochemistry at the University of Wisconsin, Madison, and public health service grants R01  
894 GM114561, R01 GM104540, and R01 GM104540-03W1 to E.R.W. from the NIH. The authors  
895 gratefully acknowledge use of facilities and instrumentation at the UW-Madison Wisconsin  
896 Centers for Nanoscale Technology ([wcnt.wisc.edu](http://wcnt.wisc.edu)), which is partially supported by the NSF  
897 through the University of Wisconsin Materials Research Science and Engineering Center (DMR-  
898 1720415). A portion of this research was supported by NIH grant U24GM129547 and performed  
899 at the PNCC at OHSU and accessed through EMSL ([grid.436923.9](http://grid.436923.9)), a DOE Office of Science  
900 User Facility sponsored by the Office of Biological and Environmental Research. We are also  
901 grateful for the use of facilities and instrumentation at the Cryo-EM Research Center in the  
902 Department of Biochemistry at the University of Wisconsin, Madison during CorRelator's  
903 performance optimization.

904 **Figures, Tables, and Legends**

905 **Figure 1**

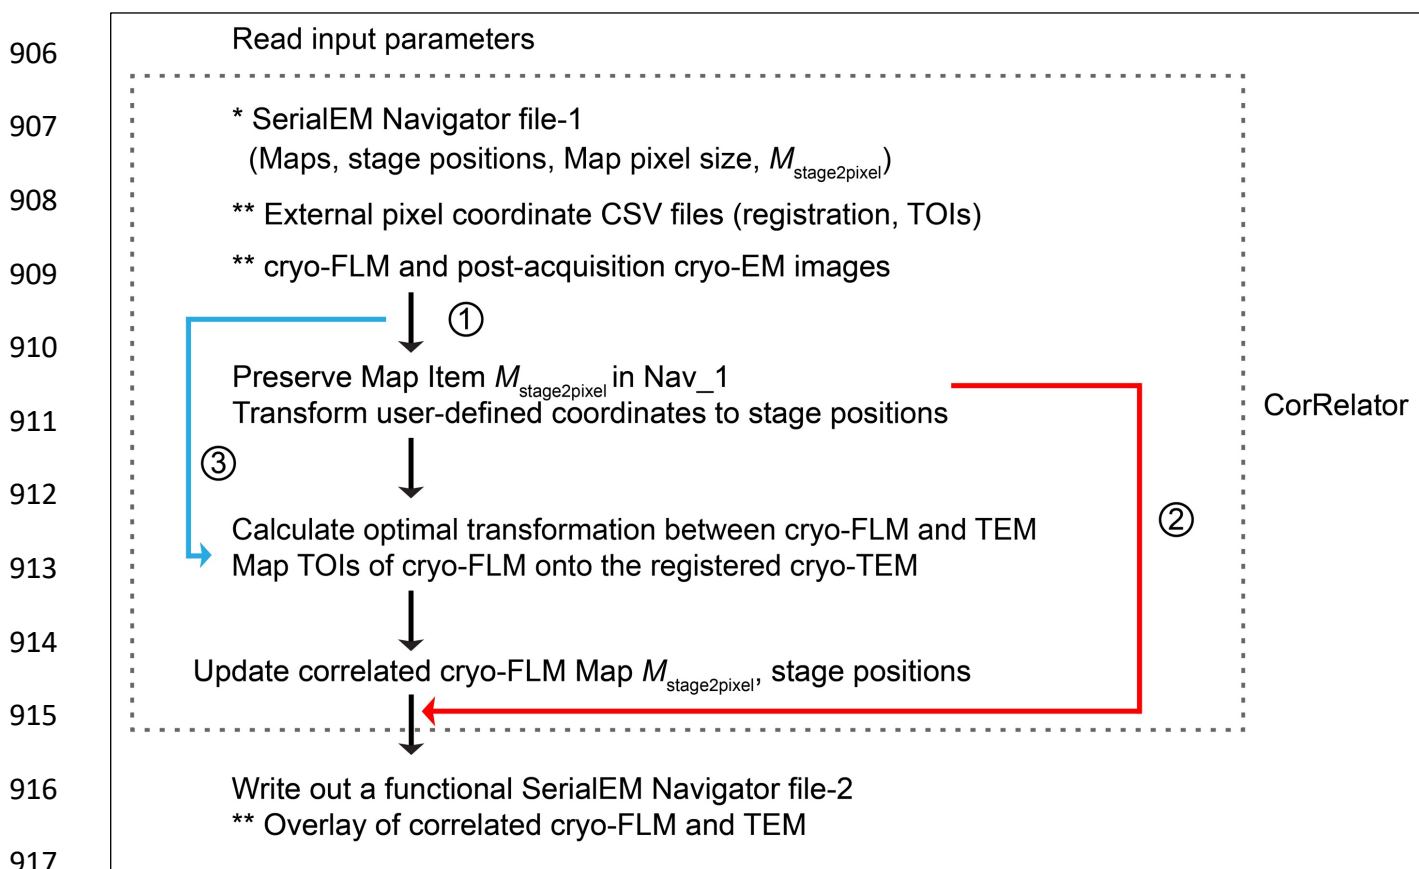

918 **Fig. 1.** Flowchart for the algorithm implemented in the CorRelator toolkit. CorRelator supports  
919 three applications for flexible correlation, labeled as ① or ② for on-the-fly (cryo)-CLEM  
920 operation, and ③ for post-acquisition correlation. An asterisk (\*) indicates the basic input file for  
921 CorRelator and \*\* indicative of optional inputs (e.g. independent csv files, cryo-FLM/EM frames  
922 for post-acquisition correlation) and optional outputs (e.g. overlay of correlated cryo-FLM/EM  
923 images). The dashed grey box surrounds the main operations performed in CorRelator.

924 **Figure 2**

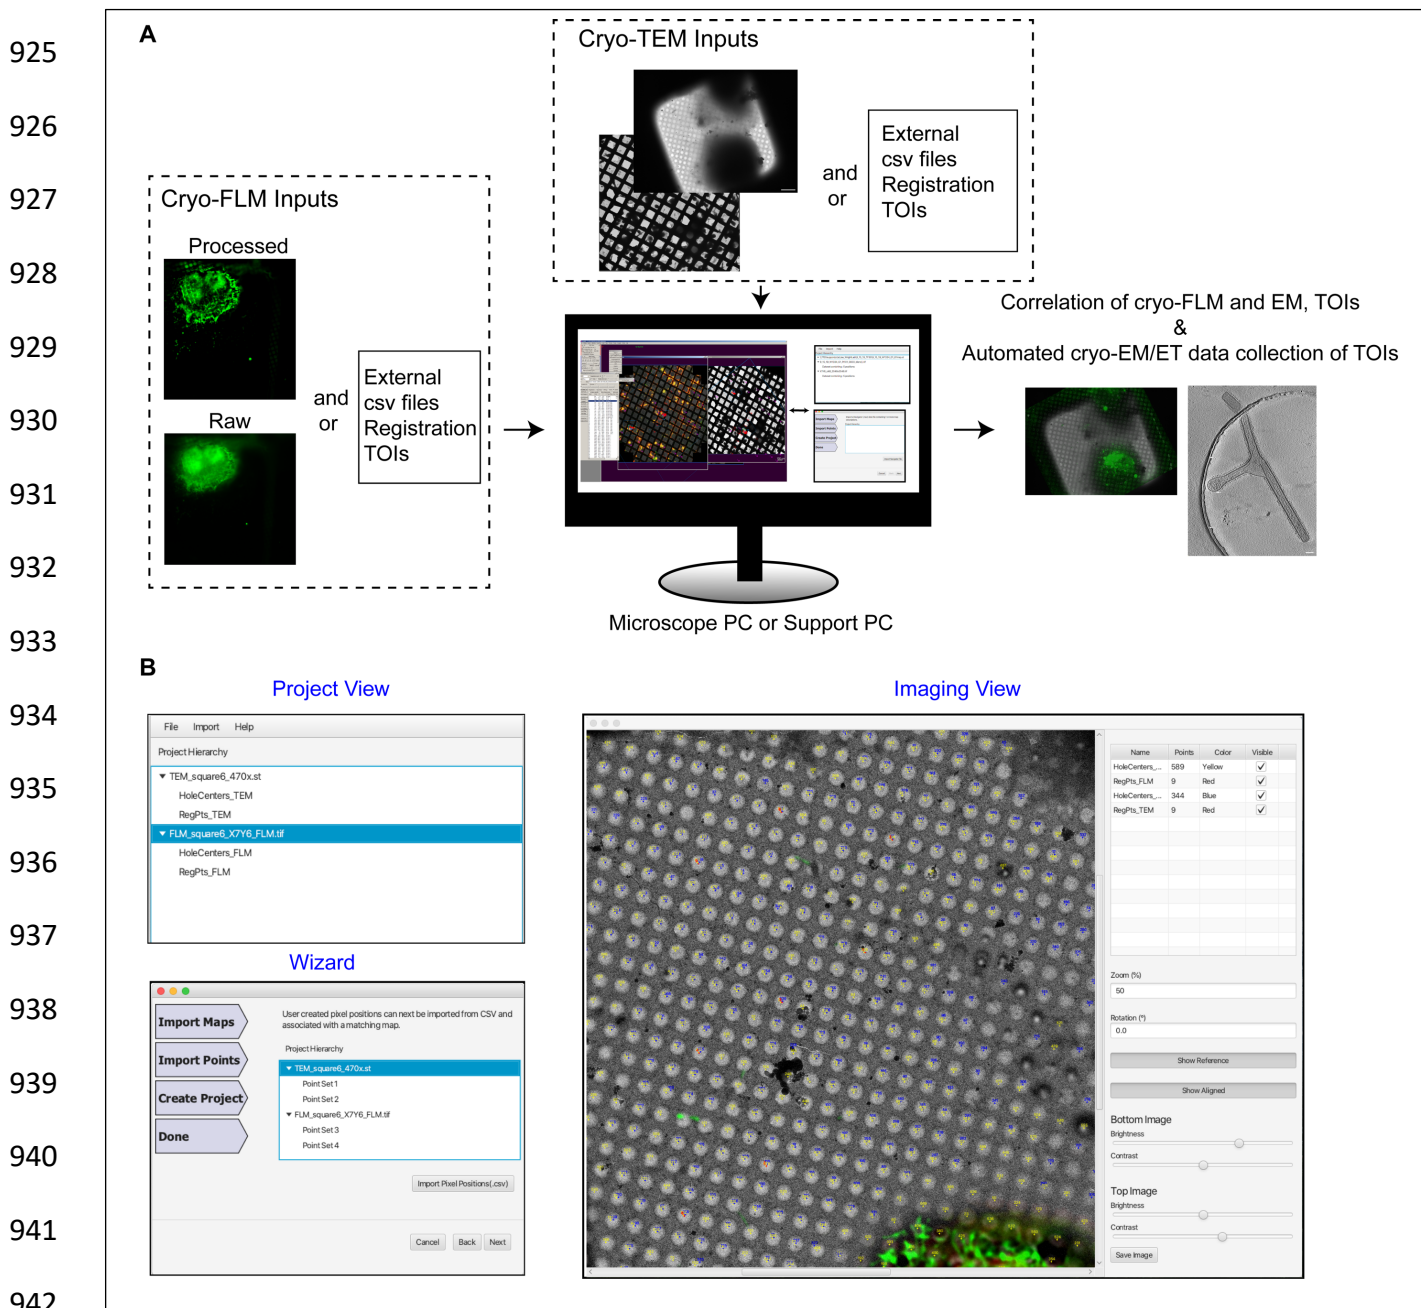

943 **Fig. 2.** CorRelator on-the-fly cryo-CLEM workflow combined with the TEM-control program

944 SerialEM. (A) CorRelator takes on-the-fly inputs from SerialEM including the navigator files,

945 cryo-FLM and TEM maps and images, and optional independent csv files for registration. The

946 resulting output can be directly imported back into SerialEM for the on-the-fly data collection of

947 identified TOIs. (B) The CorRelator GUI features a *Project* view, an intuitive *Wizard*, and multiple  
948 image and alignment views. The GUI allows for an iterative user-in-the-loop labeling of  
949 registration positions and a quick feedback-based affine transformation to align stage positions  
950 between the FLM and TEM imaging.

951 **Figure 3**

952

953

954

955

956

957

958

959

960

961

962

963

964

965

966

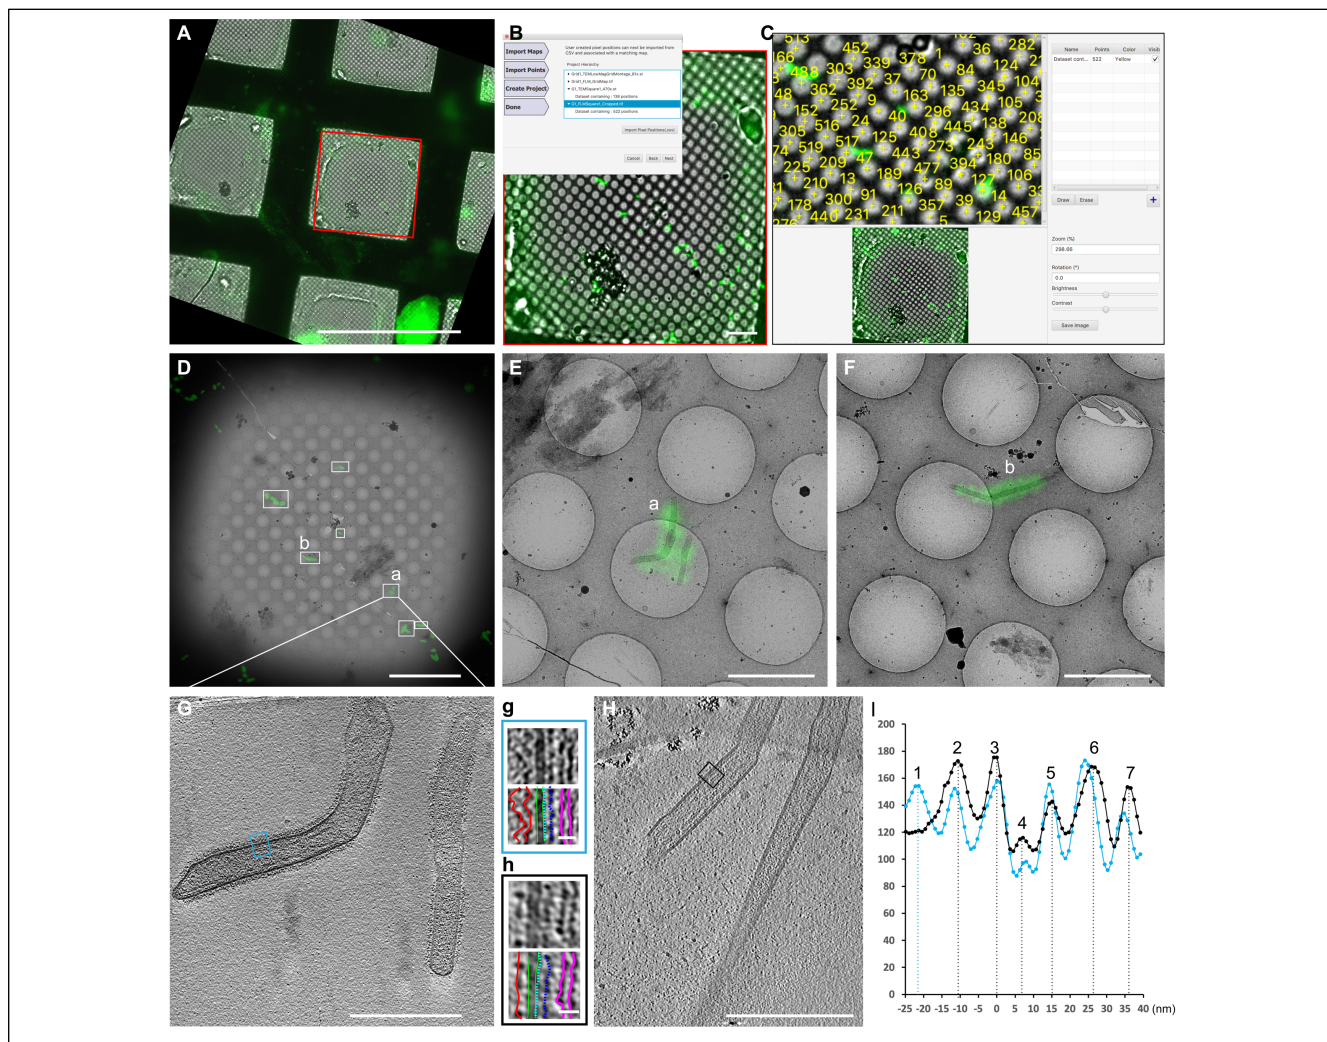

967 **Fig. 3.** CorRelator cryo-CLEM workflow of a representative square of interest. The green  
968 fluorescence signal is indicative of Nanogold-Alexa488 immuno-labeling of the RSV F  
969 glycoprotein. (A) A raw FLM square image prior to being imported into SerialEM. The red boxed  
970 area is the cropped and rotated FLM frame imported into SerialEM, as in Supplementary Figure  
971 2, Step 1. (B) The Wizard window that guides the user to import the SerialEM Nav\_2 and external  
972 csv files into CorRelator, as in Supplementary Figure 2, Step 3. (C) The image viewer where an  
973 iterative and interactive registration is initiated for fine alignment and transformation. The

974 imported external hole centroids (yellow) are numbered and can be visible (on and off) for guided  
975 manual registration. (D) Superposition of the correlated cryo-TEM map and -FLM map. White  
976 boxed areas indicate the TOIs where high magnification images and cryo-tilt series were recorded  
977 based on the transformed green signal. (E-F) Magnified overlays of correlated cryo-TEM and FLM  
978 mosaics of the boxed areas (a) and (b) in D. (G) A tomographic slice view (thickness of ~9 nm)  
979 corresponding to the position (a) in D and E. The inset g is a magnified view of the blue-boxed  
980 area in G. (H) A tomographic slice (thickness of ~9 nm) of released unlabeled RSV particles. The  
981 inset h is a magnified view of the black-boxed area in H. (I) The linear profiles of g (blue line) and  
982 h (black line) highlight RSV structural components: surface glycoproteins (peak 1-2, lineated in  
983 red in g and h, peak 1 corresponding to the secondary antibody nanogold-Alexa488 anti-human  
984 IgG against viral glycoproteins of peak 2), viral outer membrane (peak 3, green), viral inner  
985 membrane and a thin layer of matrix beneath (peak 4, green, cyan), M2-1 protein (peak 5, navy  
986 blue), RNP (peak 6-7, pink). Scale bars: 200  $\mu\text{m}$  in A, B, 10  $\mu\text{m}$  in C, D, 2  $\mu\text{m}$  in E, F, 500 nm in  
987 G, H, 20 nm in g and h.

988 **Figure 4**

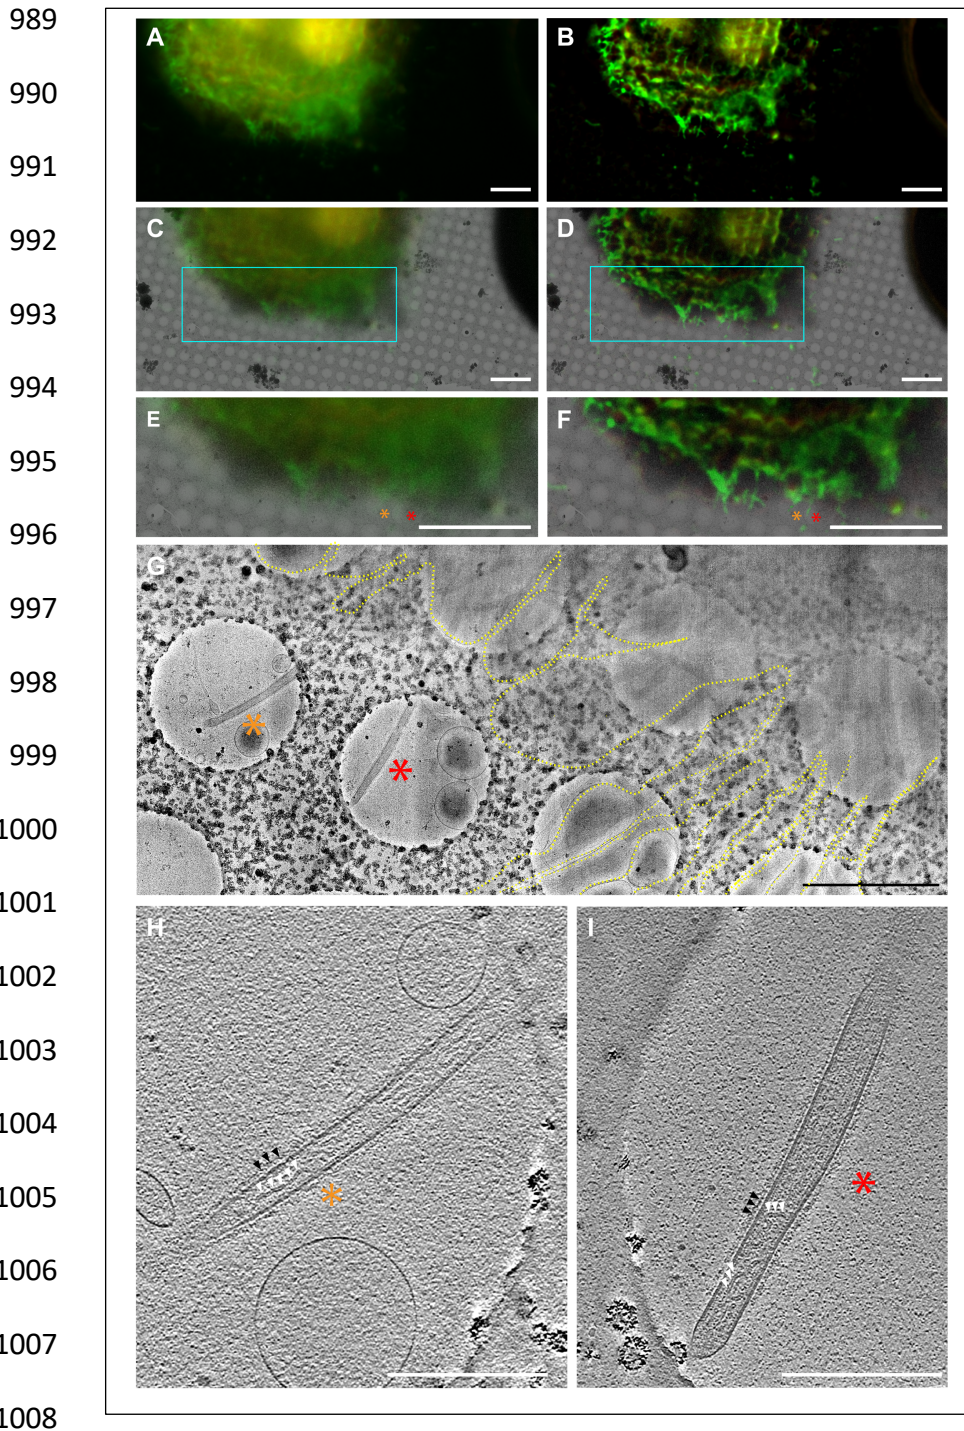

1009 **Fig. 4.** Cryo-CLEM-CorRelator with THUNDER-processed FLM images. (A) Raw widefield  
1010 FLM image of an RSV-infected cell displaying a fluorescent reporter gene in RSV-infected cells



1011 (red) and labeled RSV F glycoprotein (green). (C) Overlay of a cryo-EM image and the  
1012 transformed fluorescence image. (E) Magnified view of the cyan boxed area marked in C. (B, D,  
1013 F) the same images A, C, E processed with THUNDER Small Volume Computational Clearance  
1014 (SVCC). The orange and red asterisks indicate RSV glycoprotein fluorescent signals marked as  
1015 TOIs on pre- and post-SVCC. (G) Magnified cryo-EM montage view of the star TOIs in E and F  
1016 of the Nanogold-Alexa488 immuno-labeled RSV particles (green). The RSV filaments extend  
1017 from the cell plasma membrane and cell protrusions (dashed yellow line). (H-I) Central sections  
1018 (thickness of ~9 nm) through the tomograms collected at the marked TOIs. White triangles  
1019 indicate the RSV ribonucleoprotein (RNP) inside the RSV filament. The black arrows note the  
1020 RSV glycoproteins bound to antibodies and 6-nm gold (peak 1 in Fig 3I). Scale bars: 10  $\mu\text{m}$  in  
1021 A-F, 2  $\mu\text{m}$  in G, 500 nm in H and I.

1022 **Figure 5**

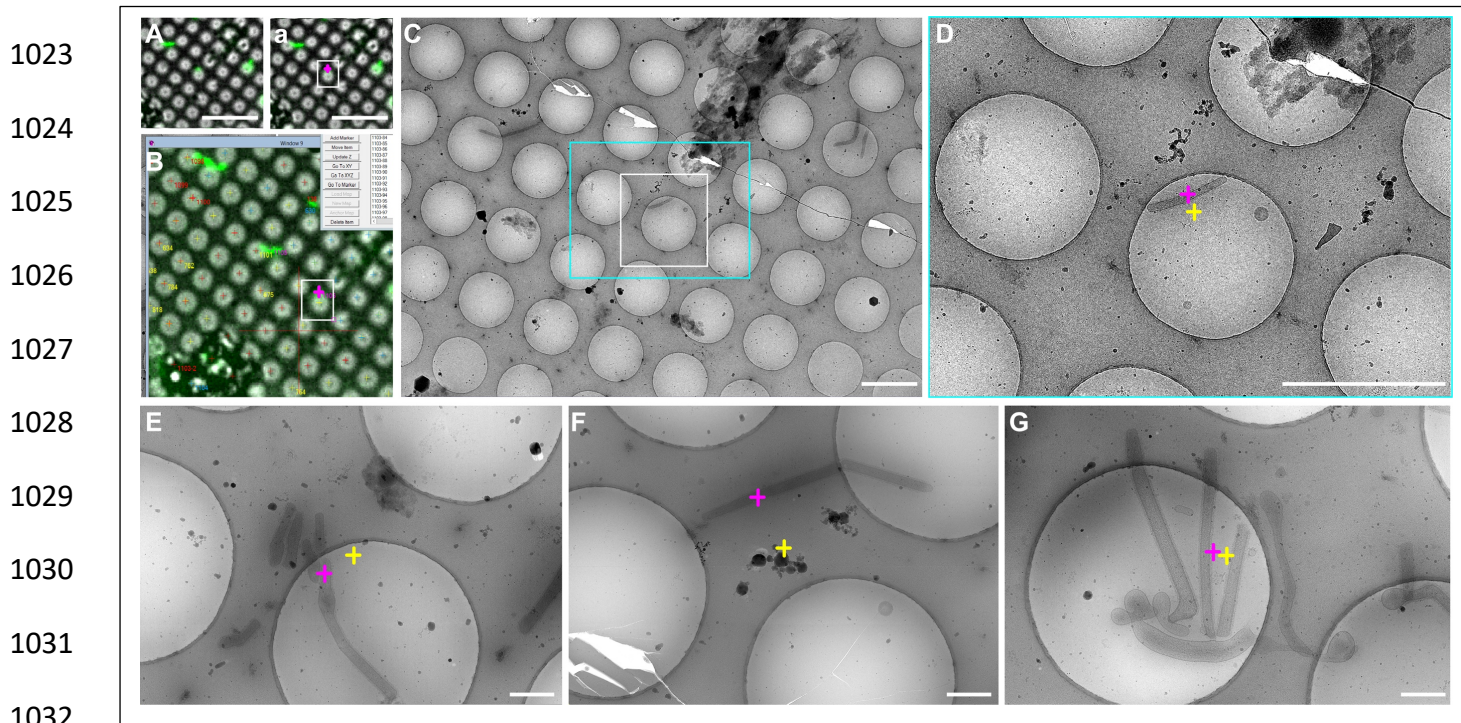

1033 **Fig. 5.** Correlation precision of on-the-fly Cryo-CLEM-CorRelator for labeled RSV particles. (A)  
1034 Single bright-field and fluorescent channel merged FLM map used to provide the TOIs (white  
1035 boxed area in (a)). The labeled RSV filaments appear green. (B) SerialEM screenshot of the post-  
1036 correlated FLM map of the same region in (A) and white boxed area in (a). The top right is part of  
1037 the Nav\_2 written out by CorRelator after being reloaded in SerialEM. The pink point indicates  
1038 the center of the virus (green) as a representative TOI in the post-correlated FLM map. (C) Higher  
1039 magnification cryo-EM image of the same white boxed hole in (a) and (B) and its surrounding  
1040 area, after moving the TEM stage to the TOI (pink cross in (a), (B)). (D) Zoomed view into the  
1041 cyan boxed area in (C). The center coordinate (yellow cross in (D-G)) of each TEM frame  
1042 corresponds to the predicted stage position by CorRelator after moving the stage. The pink cross  
1043 in (D-G) indicates the actual TOIs. (E-G) High magnification TEM images that are analogous

- 1044 coordinates for both actual (pink cross) and predicted positions (yellow cross). Scale bars: 10  $\mu\text{m}$
- 1045 in A and a, 2  $\mu\text{m}$  in C-D, 500 nm in E-G.

1046 **Figure 6**

1047  
1048  
1049  
1050  
1051  
1052  
1053  
1054  
1055  
1056

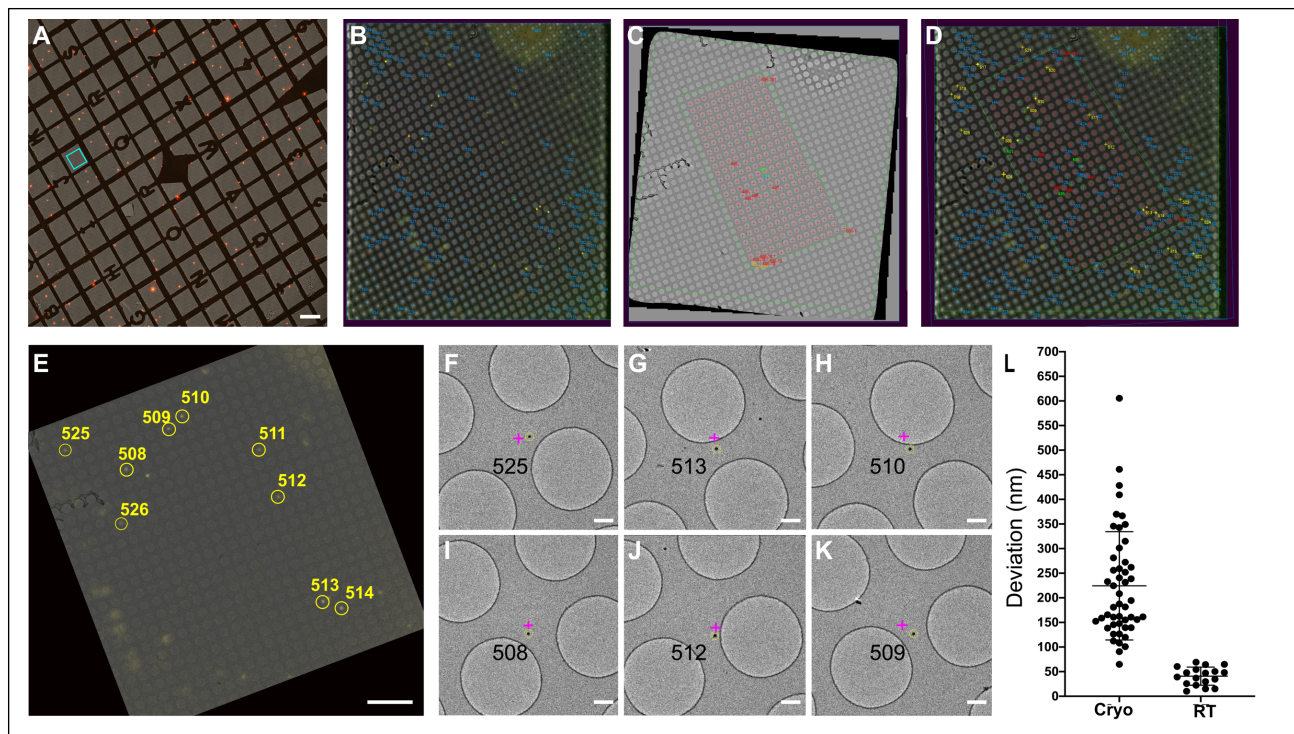

1057 **Fig. 6.** Correlation of TetraSpeck beads under ambient conditions (room temperature). (A) FLM  
1058 grid montage of a TetraSpeck-coated Quantifoil Finder grid. (B) SerialEM screenshot of a single  
1059 FLM image of the region corresponding to the cyan boxed area in (A). Hole centers were identified  
1060 offline with Fiji (blue crosses) and displayed as imported “external” stage positions after reloading  
1061 the Nav\_2 written by CorRelator, prior to correlation in SerialEM. (C) SerialEM Screenshot of a  
1062 single medium-magnification TEM image corresponding to the square image of (B). Hole centers  
1063 (red cross) were identified online with SerialEM ‘Add Grid of Points’ function to fill a polygon  
1064 (green) item. (D) Post-correlation screenshot of the FLM map (B) and TEM map (C) in SerialEM.  
1065 The hole center stage positions (C) (red) were transferred into the FLM map after correlation. The  
1066 hole centers that were used for registration are marked in green, while numbered yellow points  
1067 (508-524) were marked as the TOIs. (E) Superposition of the TEM and FLM correlated maps. The  
1068 same TOIs in D were circled in yellow. (F-G) Acquired high-magnification images at the yellow

1069 TOIs in D and E after moving the stage to the predicted positions (pink cross). The yellow circle  
1070 was centered on the actual TOIs using the 2D Gaussian fit. The pink cross marks the predicted  
1071 coordinates of the TOIs calculated by CorRelator. (L) Distribution plot of the coordinate deviation  
1072 by CorRelator between the actual TOIs and predicated positions under cryogenic ( $n = 50$ ) and  
1073 ambient conditions ( $n = 19$ ). TOIs are TetraSpeck beads for ambient CLEM. Scale bars: 200  $\mu\text{m}$   
1074 in A, 10  $\mu\text{m}$  in E, 500 nm in F-G.

1075 **Table 1**  
1076

| Data Sets                                                                  | Post-acquisition deviation (nm)      |              |                        |              | On the fly deviation (nm)                          |               |
|----------------------------------------------------------------------------|--------------------------------------|--------------|------------------------|--------------|----------------------------------------------------|---------------|
|                                                                            | Hole Centroids<br>(2 $\mu\text{m}$ ) |              | TetraSpeck<br>(500 nm) |              | RSV particles<br>(filamentous, 1~2 $\mu\text{m}$ ) |               |
|                                                                            | X                                    | Y            | X                      | Y            | X                                                  | Y             |
| Sample 1: Cryo-CLEM nanogold-Alexa labeled RSV on a Quantifoil grid        | 69.8<br>(20)                         | 72.5<br>(20) | 46.2<br>(12)           | 54.2<br>(12) | 147.9<br>(27)                                      | 141.7<br>(27) |
| Sample 2: Cryo-CLEM nanogold-Alexa labeled RSV on a Quantifoil Finder grid | 67.3<br>(24)                         | 61.2<br>(24) | 49.9<br>(12)           | 30.8<br>(12) | 173.5<br>(23)                                      | 155.6<br>(23) |

1077  
1078 Measurements of CorRelator target prediction performance were performed on two independent  
1079 data sets of vitrified HeLa cells infected by respiratory syncytial virus (RSV) grown on two types  
1080 of grids. The hole centroid pairs ( $n = 9$ ) picked through automated Hough Circle Transform  
1081 function in Fiji were used for registration. The non-registration hole centers (leave-out-one  
1082 method) and TetraSpeck beads were considered as TOIs and used to calculate predicted errors in  
1083 the application of post-acquisition deviation (left). The mean relocation error in X and Y after  
1084 TEM stage movement during on-the-fly TEM relocation of vitrified RSV was calculated.

1085 **Table 2**  
1086

| Data Sets                                                                                        | Post-acquisition deviation (nm) |              |                       |             | On the fly deviation (nm) |              |              |              |
|--------------------------------------------------------------------------------------------------|---------------------------------|--------------|-----------------------|-------------|---------------------------|--------------|--------------|--------------|
|                                                                                                  | Hole Centroids<br>(2 $\mu$ m)   |              | TetraSpeck<br>(100nm) |             | SerialEM                  |              | CorRelator   |              |
|                                                                                                  | X                               | Y            | X                     | Y           | X                         | Y            | X            | Y            |
| Sample 3:<br>FluoSphere of<br>100 nm on a<br>Quantifoil<br>Finder grid at<br>room<br>temperature | 14.1<br>(12)                    | 16.7<br>(12) | 4.8<br>(12)           | 5.7<br>(12) | 92.2<br>(19)              | 76.7<br>(19) | 28.4<br>(19) | 29.0<br>(19) |

1087

1088 Measurements of CorRelator target prediction performance were performed on a TetraSpeck-

1089 coated Finder grid imaged at ambient condition. On the left: the hole centroid pairs (n = 9) picked

1090 through automated Hough Circle Transform function in Fiji were used for registration. The non-

1091 registration hole centers (leave-out-one method) and TetraSpeck beads were considered as TOIs

1092 and used to calculate predicted errors in the application of post-acquisition deviation. On the right:

1093 The mean relocation error in X and Y after TEM stage movement during on-the-fly TEM

1094 correlation of TetraSpeck targets was calculated. The functions ‘Add Grid of Points’ and

1095 ‘Transform Items’ in SerialEM were applied to identify hole centroids on the TEM map and to

1096 correlate two modalities. SerialEM column: the hole identification of FLM was done in CorRelator

1097 while the hole identification of TEM, registration, and transformation of both modalities were

1098 performed in SerialEM. CorRelator column: the hole identification, registration, and

1099 transformation of FLM and TEM were both done in CorRelator. The output Nav\_2 was then

1100 reloaded in SerialEM.
